# Supplementary material
Source: MDPI journal article supplement (https://www.mdpi.com/2304-6767/11/2/33)
Supplement: s1 [file s1]

Supplementary file 2. The types of programs and the outcomes assessed categorized by the type of and level of outcomes

| Author(s), year                                          | Individual level outcomes |                 |              |        |                                    |                       |                  | Family level outcomes                       |                                |                                     |                 |
|----------------------------------------------------------|---------------------------|-----------------|--------------|--------|------------------------------------|-----------------------|------------------|---------------------------------------------|--------------------------------|-------------------------------------|-----------------|
|                                                          | Dental caries             | Gingival health | Oral hygiene | OHRQoL | Oral health knowledge and attitude | Oral health behaviors | Miscellaneous    | Parental oral health knowledge and attitude | Parental oral health behaviors | Parent distress and family function | Parental OHRQoL |
| <b>Oral Health Education (OHE) programs</b>              |                           |                 |              |        |                                    |                       |                  |                                             |                                |                                     |                 |
| 1. Bizarra et al. 2019 <sup>42</sup>                     |                           | +               | 0            |        |                                    |                       |                  |                                             |                                |                                     |                 |
| 2. Faulks et al. 2000 <sup>49</sup>                      |                           |                 |              |        | +                                  | +                     |                  |                                             |                                |                                     |                 |
| 3. Freeman et al. 2016 <sup>43</sup>                     |                           |                 |              | +      | +                                  | 0                     |                  |                                             |                                |                                     |                 |
| 4. Ganss et al. 2019 <sup>44</sup>                       |                           | +/-             | +/-          |        |                                    |                       |                  |                                             |                                |                                     |                 |
| 5. Henry et al. 2017 (Systematic review) <sup>61</sup>   | +                         |                 |              |        |                                    |                       |                  |                                             |                                |                                     |                 |
| 6. Hoeft et al. 2016 <sup>*55</sup>                      |                           |                 |              |        |                                    |                       |                  | +                                           | +                              |                                     |                 |
| 7. Lambert 2019 <sup>45</sup>                            | +                         |                 | +            |        | +                                  |                       |                  |                                             |                                |                                     |                 |
| 8. Livny et al. 2007 <sup>52</sup>                       | 0                         |                 |              |        |                                    | 0                     |                  |                                             |                                |                                     |                 |
| 9. Livny et al. 2008 <sup>53</sup>                       |                           |                 |              |        |                                    | +                     |                  |                                             |                                |                                     |                 |
| 10. Lopez Cazaux et al. 2019 <sup>51</sup>               |                           |                 |              |        |                                    | +                     |                  |                                             |                                |                                     |                 |
| 11. Mariño et al. 2013 <sup>46</sup>                     |                           | +               |              |        |                                    | +                     |                  |                                             |                                |                                     |                 |
| 12. Mariño et al. 2016 <sup>47</sup>                     |                           |                 |              |        | +                                  | +                     |                  |                                             |                                |                                     |                 |
| 13. Nakre et al. 2013 (Systematic review) <sup>*60</sup> | +/0                       | +               | +/0          |        | +                                  | +                     |                  | +                                           | +                              |                                     |                 |
| 14. Nihtilä et al. 2017 <sup>48</sup>                    |                           |                 | +            |        |                                    |                       |                  |                                             |                                |                                     |                 |
| 15. Phlypo et al. 2018 <sup>37</sup>                     |                           | 0               | 0            |        | 0                                  |                       |                  |                                             |                                |                                     |                 |
| 16. Plutzer et al. 2008 <sup>36</sup>                    | +                         |                 |              |        |                                    |                       |                  |                                             |                                |                                     |                 |
| 17. Sakayori et al. 2016 <sup>35</sup>                   |                           |                 |              |        |                                    |                       | + (SF)<br>+ (OF) |                                             |                                |                                     |                 |

| Author(s), year                                         | Individual level outcomes |                 |              |        |                                    |                       |               | Family level outcomes                       |                                |                                     |                 |
|---------------------------------------------------------|---------------------------|-----------------|--------------|--------|------------------------------------|-----------------------|---------------|---------------------------------------------|--------------------------------|-------------------------------------|-----------------|
|                                                         | Dental caries             | Gingival health | Oral hygiene | OHRQoL | Oral health knowledge and attitude | Oral health behaviors | Miscellaneous | Parental oral health knowledge and attitude | Parental oral health behaviors | Parent distress and family function | Parental OHRQoL |
| 18. Samson et al. 2009 <sup>34</sup>                    |                           |                 | +/-          |        |                                    |                       |               |                                             |                                |                                     |                 |
| 19. Schulz-Weidner et al. 2021 <sup>56</sup>            |                           | +               | +            |        |                                    |                       |               |                                             |                                |                                     |                 |
| 20. Seo and Kim 2020 (Systematic review) <sup>57</sup>  |                           |                 |              | +      |                                    |                       | +             |                                             |                                |                                     |                 |
| 21. Sfeatcu et al. 2019 <sup>33</sup>                   | +                         | +               |              |        | +                                  | +                     |               |                                             |                                |                                     |                 |
| 22. Smith et al. 2018 <sup>54</sup>                     | +                         |                 |              |        |                                    |                       |               |                                             |                                |                                     |                 |
| 23. Stein et al. 2016 (Systematic review) <sup>58</sup> | +/-                       | +/-             | +/-          |        | +                                  | +                     |               |                                             |                                |                                     |                 |
| 24. Tubert-Jeannin et al. 2012 <sup>41</sup>            | +/-                       |                 |              |        |                                    |                       |               |                                             |                                |                                     |                 |
| 25. Ueno et al. 2012 <sup>40</sup>                      |                           | +               | +            |        |                                    |                       | +             |                                             |                                |                                     |                 |
| 26. Van den Branden et al. 2014 <sup>38</sup>           |                           |                 |              |        | +/-                                |                       |               |                                             |                                |                                     |                 |
| 27. Wagner et al. 2016 <sup>39</sup>                    | +                         |                 |              |        |                                    |                       |               |                                             |                                |                                     |                 |
| 28. Wang et al. 2015 (Systematic review) <sup>59</sup>  |                           |                 | +            |        |                                    |                       |               |                                             |                                |                                     |                 |
| 29. Winter et al. 2018 <sup>50</sup>                    |                           |                 |              |        | +                                  | +                     |               |                                             |                                |                                     |                 |
| <b>Diagnostic and preventive programs</b>               |                           |                 |              |        |                                    |                       |               |                                             |                                |                                     |                 |
| 1. Achembong et al. 2014 <sup>66</sup>                  | +                         |                 |              |        |                                    |                       |               |                                             |                                |                                     |                 |
| 2. Andruškevičienė et al. 2008 <sup>78</sup>            | +                         |                 | +            |        |                                    |                       |               |                                             |                                |                                     |                 |

| Author(s), year                                | Individual level outcomes |                 |              |        |                                    |                       |                   | Family level outcomes                       |                                |                                     |                 |
|------------------------------------------------|---------------------------|-----------------|--------------|--------|------------------------------------|-----------------------|-------------------|---------------------------------------------|--------------------------------|-------------------------------------|-----------------|
|                                                | Dental caries             | Gingival health | Oral hygiene | OHRQoL | Oral health knowledge and attitude | Oral health behaviors | Miscellaneous     | Parental oral health knowledge and attitude | Parental oral health behaviors | Parent distress and family function | Parental OHRQoL |
| 3. Bergström et al. 2015 <sup>77</sup>         | +                         |                 |              |        |                                    |                       |                   |                                             |                                |                                     |                 |
| 4. Burgette et al. 2017* <sup>92</sup>         |                           |                 |              | +      |                                    |                       |                   |                                             |                                | +                                   |                 |
| 5. Dohnke - Hohrmann et al. 2004 <sup>67</sup> | +                         |                 |              |        |                                    |                       |                   |                                             |                                |                                     |                 |
| 6. Dudovitz et al. 2018 <sup>89</sup>          | +                         |                 |              |        | 0                                  |                       |                   |                                             |                                |                                     |                 |
| 7. Eckersten et al. 2010 <sup>97</sup>         |                           |                 |              |        |                                    |                       | 0 (F)             |                                             |                                |                                     |                 |
| 8. García-Pola et al. 2021 <sup>94</sup>       | +                         |                 |              |        |                                    |                       |                   |                                             |                                |                                     |                 |
| 9. Källestål 2005 <sup>69</sup>                | +                         |                 |              |        |                                    |                       |                   |                                             |                                |                                     |                 |
| 10. Kim et al. 2017 <sup>93</sup>              |                           |                 | +            |        |                                    |                       |                   |                                             |                                |                                     |                 |
| 11. Lai et al. 2018 <sup>90</sup>              | +                         |                 |              |        |                                    |                       |                   |                                             |                                |                                     |                 |
| 12. Lee et al. 2017 <sup>83</sup>              |                           | +               |              |        |                                    |                       |                   |                                             |                                |                                     |                 |
| 13. Lee et al. 2021 <sup>95</sup>              | 0                         | +               | +            |        |                                    |                       | + (SF)<br>+ (QoL) |                                             |                                |                                     |                 |
| 14. Lin et al. 2011 <sup>91</sup>              |                           | +               |              |        | +                                  | +                     |                   |                                             |                                |                                     |                 |
| 15. Macnab et al. 2008 <sup>76</sup>           | +                         |                 |              |        |                                    | +                     |                   |                                             |                                |                                     |                 |
| 16. Meyer et al. 2014 <sup>79</sup>            | +                         |                 |              |        |                                    |                       |                   |                                             |                                |                                     |                 |
| 17. Milsom et al. 2014 <sup>68</sup>           | +                         |                 |              |        |                                    |                       |                   |                                             |                                |                                     |                 |
| 18. Sköld et al. 2005 <sup>84</sup>            | +                         |                 |              |        |                                    |                       |                   |                                             |                                |                                     |                 |
| 19. Muller-Bolla et al. 2016 <sup>88</sup>     | +                         |                 |              |        |                                    |                       |                   |                                             |                                |                                     |                 |
| 20. Nakamura et al. 2009 <sup>82</sup>         | +                         |                 |              |        |                                    |                       |                   |                                             |                                |                                     |                 |
| 21. Pieper et al. 2013 <sup>71</sup>           | +                         |                 |              |        |                                    |                       |                   |                                             |                                |                                     |                 |
| 22. Ruff et al. 2018 <sup>85</sup>             | +                         |                 |              |        |                                    |                       |                   |                                             |                                |                                     |                 |
| 23. Schroth et al. 2015* <sup>87</sup>         | +                         |                 |              |        | +                                  | +                     |                   | +                                           | + / 0                          |                                     |                 |

| Author(s), year                           | Individual level outcomes |                 |              |        |                                    |                       |               | Family level outcomes                       |                                |                                     |                 |
|-------------------------------------------|---------------------------|-----------------|--------------|--------|------------------------------------|-----------------------|---------------|---------------------------------------------|--------------------------------|-------------------------------------|-----------------|
|                                           | Dental caries             | Gingival health | Oral hygiene | OHRQoL | Oral health knowledge and attitude | Oral health behaviors | Miscellaneous | Parental oral health knowledge and attitude | Parental oral health behaviors | Parent distress and family function | Parental OHRQoL |
| 24. Simmer-Beck et al. 2015 <sup>86</sup> | +                         |                 |              |        |                                    |                       |               |                                             |                                |                                     |                 |
| 25. Sköld et al. 2016 <sup>64</sup>       | +                         |                 |              |        |                                    |                       |               |                                             |                                |                                     |                 |
| 26. Slade et al. 2011 <sup>63</sup>       | +                         |                 |              |        |                                    |                       |               |                                             |                                |                                     |                 |
| 27. Sloane et al. 2013 <sup>80</sup>      |                           | +               | +            |        |                                    |                       |               |                                             |                                |                                     |                 |
| 28. Starr et al. 2021 <sup>96</sup>       | +                         |                 |              |        |                                    |                       |               |                                             |                                |                                     |                 |
| 29. Sundell et al. 2013 <sup>70</sup>     | 0                         |                 |              |        |                                    |                       |               |                                             |                                |                                     |                 |
| 30. Wagner et al. 2017 <sup>65</sup>      | +                         |                 |              |        |                                    |                       |               |                                             |                                |                                     |                 |
| 31. Wennhall et al. 2005 <sup>81</sup>    | +                         |                 |              |        |                                    | +                     |               |                                             |                                |                                     |                 |
| 32. Wennhall et al. 2008 <sup>73</sup>    | +                         | 0               | 0            |        |                                    | 0                     |               |                                             |                                |                                     |                 |
| 33. Winter et al. 2016 <sup>75</sup>      | +                         |                 |              |        |                                    |                       |               |                                             |                                |                                     |                 |
| 34. Winter et al. 2018 <sup>74</sup>      | +                         |                 |              |        |                                    |                       |               |                                             |                                |                                     |                 |
| 35. Zimmer et al. 2001 <sup>72</sup>      | 0/+                       |                 |              |        |                                    |                       |               |                                             |                                |                                     |                 |
| <b>Interventional programs</b>            |                           |                 |              |        |                                    |                       |               |                                             |                                |                                     |                 |
| 1. Alsumiat et al. 2015 <sup>98</sup>     |                           |                 |              | 0      | 0                                  | 0                     |               |                                             |                                |                                     |                 |
| 2. Alsumiat et al. 2019* <sup>99</sup>    | +                         |                 |              | 0      |                                    |                       |               | 0                                           | 0                              |                                     | 0               |
| 3. George et al. 2018 <sup>106</sup>      | +                         | +               | +            |        | +                                  | +                     |               |                                             |                                |                                     |                 |
| 4. Gomez et al. 2001 <sup>105</sup>       | +                         |                 |              |        |                                    |                       |               |                                             |                                |                                     |                 |
| 5. Hyde et al. 2005 <sup>103</sup>        |                           |                 |              |        |                                    | +                     |               |                                             |                                |                                     |                 |
| 6. Hyde et al. 2006 <sup>104</sup>        |                           |                 |              | +      |                                    |                       |               |                                             |                                |                                     |                 |
| 7. Janssens et al. 2018 <sup>102</sup>    | +                         |                 |              |        |                                    |                       | + (OHS)       |                                             |                                |                                     |                 |
| 8. Larsen et al. 2016 <sup>107</sup>      | +                         |                 |              |        |                                    |                       |               |                                             |                                |                                     |                 |

| Author(s), year                              | Individual level outcomes |                 |              |        |                                    |                       |               | Family level outcomes                       |                                |                                     |                 |
|----------------------------------------------|---------------------------|-----------------|--------------|--------|------------------------------------|-----------------------|---------------|---------------------------------------------|--------------------------------|-------------------------------------|-----------------|
|                                              | Dental caries             | Gingival health | Oral hygiene | OHRQoL | Oral health knowledge and attitude | Oral health behaviors | Miscellaneous | Parental oral health knowledge and attitude | Parental oral health behaviors | Parent distress and family function | Parental OHRQoL |
| 9. Ortuno Borroto et al. 2021 <sup>109</sup> |                           |                 |              | +      |                                    |                       |               |                                             |                                |                                     |                 |
| 10. Rong et al. 2009 <sup>108</sup>          | +                         | +               |              | 0      |                                    |                       |               |                                             |                                |                                     |                 |
| 11. Walker et al. 2007 <sup>101</sup>        |                           |                 |              | +      |                                    |                       |               |                                             |                                |                                     |                 |
| 12. Wyatt et al. 2009 <sup>100</sup>         |                           |                 |              |        |                                    |                       | + (COD)       |                                             |                                |                                     |                 |

Miscellaneous outcomes include Salivary Flow/Salivary Secretion (SF), Malodor (M), Fluorosis (F), Oral Function (OF), Quality of Life (QoL), Oral Health Stability (OHS), and Clinical Oral Disorder (COD).

+ indicates a favorable outcome

- indicates an unfavorable outcome

0 indicates no change

\* indicates that the study addresses a family level outcome
