# Supplementary material
Source: MDPI journal article supplement (https://www.mdpi.com/2304-6767/11/2/33)
Supplement: s1 [file s1]

Supplementary file 3. Program setting classification

| Author(s), year                                | Country       | Study design          | Personnel category                                                                                   | Target group category    | Program type              | Follow-up period |
|------------------------------------------------|---------------|-----------------------|------------------------------------------------------------------------------------------------------|--------------------------|---------------------------|------------------|
| <b>School based setting</b>                    |               |                       |                                                                                                      |                          |                           |                  |
| 1. Alsumiat et al. 2015 <sup>98</sup>          | Kuwait        | Cross-sectional study | N/A                                                                                                  | Adolescents              | Interventional            | N/A              |
| 2. Alsumiat et al. 2019 <sup>99</sup>          | Kuwait        | Cross-sectional study | Dental personnel                                                                                     | Children                 | Interventional            | 3 years          |
| 3. Andruškevičienė et al. 2008 <sup>78</sup>   | Lithuania     | Experimental study    | Non-healthcare personnel                                                                             | Children                 | Diagnostic and preventive | 3 years          |
| 4. Bergström et al. 2015 <sup>77</sup>         | Sweden        | Retrospective study   | <ul style="list-style-type: none"> <li>Healthcare personnel</li> <li>Dental personnel</li> </ul>     | Children                 | Diagnostic and preventive | 4 years          |
| 5. Burgette et al. 2017 <sup>92</sup>          | United States | Experimental study    | N/A                                                                                                  | Children                 | Diagnostic and preventive | 2 years          |
| 6. Dohnke – Hohrmann et al. 2004 <sup>67</sup> | Germany       | Experimental study    | N/A                                                                                                  | Children                 | Diagnostic and preventive | 4 years          |
| 7. Dudovitz et al. 2018 <sup>89</sup>          | United States | Cross-sectional study | Dental personnel                                                                                     | Children                 | Diagnostic and preventive | 1 year           |
| 8. Freeman et al. 2016 <sup>43</sup>           | Ireland       | Experimental study    | <ul style="list-style-type: none"> <li>Non-healthcare personnel</li> <li>Dental personnel</li> </ul> | Children                 | OHE                       | 1 year           |
| 9. Lambert et al. 2019 <sup>45</sup>           | Belgium       | Experimental study    | Dental personnel                                                                                     | Children                 | OHE                       | 4 years          |
| 10. Livny et al. 2008 <sup>53</sup>            | Israel        | Experimental study    | Dental personnel                                                                                     | Children                 | OHE                       | 2 years          |
| 11. Lopez Cazaux et al. 2019 <sup>51</sup>     | France        | Experimental study    | Dental personnel                                                                                     | Children and Adolescents | OHE                       | 8 months         |
| 12. Macnab et al. 2008 <sup>76</sup>           | Canada        | Cross-sectional study | <ul style="list-style-type: none"> <li>Dental personnel</li> </ul>                                   | Adolescents              | Diagnostic and preventive | 3 years          |

| Author(s), year                               | Country       | Study design                              | Personnel category                                                                                    | Target group category | Program type              | Follow-up period |
|-----------------------------------------------|---------------|-------------------------------------------|-------------------------------------------------------------------------------------------------------|-----------------------|---------------------------|------------------|
|                                               |               |                                           | <ul style="list-style-type: none"> <li>Healthcare personnel</li> </ul>                                |                       |                           |                  |
| 13. Sköld et al. 2005 <sup>84</sup>           | Sweden        | Experimental study                        | Dental personnel                                                                                      | Adolescents           | Diagnostic and preventive | 3 years          |
| 14. Muller-Bolla et al. 2016 <sup>88</sup>    | France        | Experimental study                        | Dental personnel                                                                                      | Children              | Diagnostic and preventive | 3 years          |
| 15. Nakamura et al. 2009 <sup>82</sup>        | Japan         | Experimental study                        | N/A                                                                                                   | Children              | Diagnostic and preventive | 5 years          |
| 16. Pieper et al. 2013 <sup>71</sup>          | Germany       | Not specified                             | N/A                                                                                                   | Adolescents           | Diagnostic and preventive | N/A              |
| 17. Ruff et al. 2018 <sup>85</sup>            | United States | Longitudinal study                        | Dental personnel                                                                                      | Children              | Diagnostic and preventive | 10 years         |
| 18. Schulz-Weidner et al. 2021 <sup>†56</sup> | Germany       | Experimental study                        | <ul style="list-style-type: none"> <li>Non-health care personnel</li> <li>Dental personnel</li> </ul> | Children              | OHE                       | 3 and 6 months   |
| 19. Sfeatcu et al. 2018 <sup>33</sup>         | Romania       | Experimental study                        | Dental personnel                                                                                      | Adolescents           | OHE                       | 2 years          |
| 20. Simmer-Beck et al. 2015 <sup>86</sup>     | United States | Secondary analyses of administrative data | Dental personnel                                                                                      | Children              | Diagnostic and preventive | N/A              |
| 21. Sköld 2016 <sup>64</sup>                  | Sweden        | Experimental study                        | Dental personnel                                                                                      | Adolescents           | Diagnostic and preventive | 3 years          |
| 22. Starr et al. 2021 <sup>92</sup>           | United States | Prospective cohort                        | Dental personnel                                                                                      | Children              | Diagnostic and preventive | 6 years          |
| 23. Sundell et al. 2013 <sup>70</sup>         | Sweden        | Experimental study                        | Dental personnel                                                                                      | Children              | Diagnostic and preventive | 2 years          |
| 24. Tubert-Jeannin et al. 2012 <sup>41</sup>  | France        | Cross-sectional study                     | Dental personnel                                                                                      | Children              | OHE                       | 1-4 years        |
| 25. Ueno et al. 2012 <sup>40</sup>            | Japan         | Experimental study                        | Dental personnel                                                                                      | Adolescents           | OHE                       | 1 year           |
| 26. Winter et al. 2016 <sup>75</sup>          | Germany       | Longitudinal study                        | N/A                                                                                                   | Children              | Diagnostic and preventive | 4 years          |

| Author(s), year                                  | Country       | Study design       | Personnel category                                                                               | Target group category | Program type              | Follow-up period |
|--------------------------------------------------|---------------|--------------------|--------------------------------------------------------------------------------------------------|-----------------------|---------------------------|------------------|
| 27. Winter et al. 2018 <sup>74</sup>             | Germany       | Experimental study | N/A                                                                                              | Children              | Diagnostic and preventive | 2 years          |
| 28. Zimmer et al. 2001 <sup>72</sup>             | Germany       | Experimental study | Dental personnel                                                                                 | Children              | Diagnostic and preventive | 2 years          |
| <b>Long term care and institutional settings</b> |               |                    |                                                                                                  |                       |                           |                  |
| 1. Bizarra et al. 2019 <sup>42</sup>             | Portugal      | Experimental study | Non-healthcare personnel                                                                         | N/A                   | OHE                       | 6 months         |
| 2. Janssens et al. 2018 <sup>102</sup>           | Belgium       | Longitudinal study | <ul style="list-style-type: none"> <li>Healthcare personnel</li> <li>Dental personnel</li> </ul> | Elders                | Interventional            | 22.5 months      |
| 3. Phlypo et al. 2018 <sup>37</sup>              | Belgium       | Experimental study | Non-healthcare personnel                                                                         | N/A                   | OHE                       | 5 weeks          |
| 4. Rong et al. 2009 <sup>108</sup>               | Hong Kong     | Experimental study | Dental personnel                                                                                 | Elders                | Interventional            | 6 months         |
| 5. Samson et al. 2009 <sup>34</sup>              | Norway        | Experimental study | Healthcare personnel                                                                             | N/A                   | OHE                       | 6 years          |
| 6. Sloane et al. 2013 <sup>80</sup>              | United States | Experimental study | Healthcare personnel                                                                             | N/A                   | Diagnostic and preventive | 8 weeks          |
| 7. Walker et al. 2007 <sup>101</sup>             | United States | Experimental study | Dental personnel                                                                                 | Elders                | Interventional            | 2 weeks-6 months |
| 8. Wyatt et al. 2009 <sup>100</sup>              | Canada        | Experimental study | Dental personnel                                                                                 | Elders                | Interventional            | 5 years          |
| <b>Medical setting</b>                           |               |                    |                                                                                                  |                       |                           |                  |
| 1. Achembong et al. 2014 <sup>66</sup>           | United States | Ecological study   | Healthcare personnel                                                                             | Children              | Diagnostic and preventive | N/A              |
| 2. George et al. 2018 <sup>106</sup>             | Australia     | Experimental study | <ul style="list-style-type: none"> <li>Healthcare personnel</li> <li>Dental personnel</li> </ul> | Adults                | Interventional            | N/A              |
| 3. Gomez et al. 2001 <sup>105</sup>              | Chile         | Experimental study | Dental personnel                                                                                 | Children              | Interventional            | 4 years          |

| Author(s), year                                      | Country       | Study design        | Personnel category                                                                                                                 | Target group category    | Program type              | Follow-up period |
|------------------------------------------------------|---------------|---------------------|------------------------------------------------------------------------------------------------------------------------------------|--------------------------|---------------------------|------------------|
| 4. Kim et al. 2017 <sup>93</sup>                     | South Korea   | Experimental study  | <ul style="list-style-type: none"> <li>Non-healthcare personnel</li> <li>Dental personnel</li> </ul>                               | Adults and Elders        | Diagnostic and preventive | 8 weeks          |
| 5. Lai et al. 2018* <sup>90</sup>                    | Singapore     | Experimental study  | Dental personnel                                                                                                                   | Children                 | Diagnostic and preventive | 2 years          |
| 6. Lee et al. 2021 <sup>95</sup>                     | Korea         | Experimental study  | Dental personnel                                                                                                                   | Adults and Elders        | Diagnostic and preventive | 6 months         |
| 7. Meyer et al. 2014 <sup>79</sup>                   | Germany       | Experimental study  | Dental personnel                                                                                                                   | Children and adolescents | Diagnostic and preventive | 18-19 years      |
| 8. Plutzer et al. 2008 <sup>36</sup>                 | Australia     | Experimental study  | N/A                                                                                                                                | Children                 | OHE                       | 1.5 years        |
| 9. Schulz-Weidner et al. 2021† <sup>56</sup>         | Germany       | Experimental study  | <ul style="list-style-type: none"> <li>Non-health care personnel</li> <li>Dental personnel</li> </ul>                              | Children                 | OHE                       | 3 and 6 months   |
| 10. Wagner et al. 2016 <sup>39</sup>                 | Austria       | Prospective cohort  | Dental personnel                                                                                                                   | Children                 | OHE                       | 5 years          |
| 11. Winter et al. 2018 <sup>50</sup>                 | Germany       | Experimental study  | <ul style="list-style-type: none"> <li>Non-healthcare personnel</li> <li>Healthcare personnel</li> <li>Dental personnel</li> </ul> | Children                 | OHE                       | N/A              |
| <b>Community-based setting/Public health setting</b> |               |                     |                                                                                                                                    |                          |                           |                  |
| 1. Eckersten et al. 2010 <sup>97</sup>               | Sweden        | Retrospective study | Dental personnel                                                                                                                   | Children                 | Diagnostic and preventive | 5-6 years        |
| 2. Faulks et al. 2000 <sup>49</sup>                  | France        | Experimental study  | Dental personnel                                                                                                                   | Adults                   | OHE                       | 9-12 months      |
| 3. Hoeft et al. 2016 <sup>55</sup>                   | United States | Experimental study  | Non-healthcare personnel                                                                                                           | Adults                   | OHE                       | 3 months         |

| Author(s), year                               | Country       | Study design          | Personnel category                                                                                           | Target group category | Program type              | Follow-up period |
|-----------------------------------------------|---------------|-----------------------|--------------------------------------------------------------------------------------------------------------|-----------------------|---------------------------|------------------|
| 4. Hyde et al. 2005 <sup>103</sup>            | United States | Experimental study    | Dental personnel                                                                                             | Adults                | Interventional            | 18 months        |
| 5. Hyde et al. 2006 <sup>104</sup>            | United States | Experimental study    | Dental personnel                                                                                             | Adults                | Interventional            | 18 months        |
| 6. Källestål 2005 <sup>69</sup>               | Sweden        | Experimental study    | Dental personnel                                                                                             | Adolescents           | Diagnostic and preventive | 5 years          |
| 7. Lee et al. 2017 <sup>83</sup>              | South Korea   | Experimental study    | Dental personnel                                                                                             | Adults and Elders     | Diagnostic and preventive | 2 months         |
| 8. Livny et al. 2007 <sup>52</sup>            | Israel        | Experimental study    | Healthcare personnel                                                                                         | Children              | OHE                       | 2 years          |
| 9. Mariño et al. 2013 <sup>46</sup>           | Australia     | Experimental study    | N/A                                                                                                          | Elders                | OHE                       | 16 weeks         |
| 10. Mariño et al. 2016 <sup>47</sup>          | Australia     | Experimental study    | N/A                                                                                                          | Adults and elders     | OHE                       | N/A              |
| 11. Nihtilä et al. 2017 <sup>48</sup>         | Finland       | Experimental study    | <ul style="list-style-type: none"> <li>• Non-healthcare personnel</li> <li>• Healthcare personnel</li> </ul> | Elders                | OHE                       | 6 months         |
| 12. Ortuno Borroto et al. 2021 <sup>109</sup> | Chile         | Prospective cohort    | Dental personnel                                                                                             | Adults and Elders     | Interventional            | N/A              |
| 13. Sakayori et al. 2016 <sup>35</sup>        | Japan         | Not specified         | Dental personnel                                                                                             | Elders                | OHE                       | 1 year           |
| 14. Schroth et al. 2015 <sup>87</sup>         | Canada        | Cross-sectional study | Dental personnel                                                                                             | Children              | Diagnostic and preventive | N/A              |
| 15. Slade et al. 2011 <sup>63</sup>           | Australia     | Experimental study    | <ul style="list-style-type: none"> <li>• Healthcare personnel</li> <li>• Dental personnel</li> </ul>         | Children              | Diagnostic and preventive | 2 years          |
| 16. Smith et al. 2018 <sup>54</sup>           | Australia     | Experimental study    | <ul style="list-style-type: none"> <li>• Healthcare personnel</li> </ul>                                     | Children              | OHE                       | 30 months        |

| Author(s), year                               | Country        | Study design                                       | Personnel category                                                                                       | Target group category | Program type              | Follow-up period |
|-----------------------------------------------|----------------|----------------------------------------------------|----------------------------------------------------------------------------------------------------------|-----------------------|---------------------------|------------------|
|                                               |                |                                                    | <ul style="list-style-type: none"> <li>Dental personnel</li> </ul>                                       |                       |                           |                  |
| 17. Van den Branden et al. 2014 <sup>38</sup> | Belgium        | Experimental study                                 | Healthcare personnel                                                                                     | Children              | OHE                       | 3 and 5 years    |
| 18. Wagner et al. 2017 <sup>65</sup>          | Germany        | Longitudinal study                                 | <ul style="list-style-type: none"> <li>Non-healthcare personnel</li> <li>Healthcare personnel</li> </ul> | Children              | Diagnostic and preventive | 5 years          |
| 19. Wennhall et al. 2005 <sup>81</sup>        | Sweden         | Experimental study                                 | Dental personnel                                                                                         | Children              | Diagnostic and preventive | 1 year           |
| 20. Wennhall et al. 2008 <sup>73</sup>        | Sweden         | Experimental study                                 | Dental personnel                                                                                         | Children              | Diagnostic and preventive | 5 years          |
| <b>Dental settings</b>                        |                |                                                    |                                                                                                          |                       |                           |                  |
| 1. Ganss et al. 2019 <sup>44</sup>            | Germany        | Retrospective study                                | Dental personnel                                                                                         | Adults                | OHE                       | 15 years         |
| 2. García-Pola et al. 2021 <sup>94</sup>      | Spain          | Prospective cohort                                 | Dental personnel                                                                                         | Children              | Diagnostic and preventive | 6 years          |
| 3. Lai et al. 2018 <sup>*90</sup>             | Singapore      | Experimental study                                 | Dental personnel                                                                                         | Children              | Diagnostic and preventive | 2 years          |
| 4. Larsen et al. 2016 <sup>107</sup>          | United States  | Retrospective data analyses of administrative data | Dental personnel                                                                                         | Children              | Interventional            | 2 years          |
| 5. Lin et al. 2011 <sup>91</sup>              | Canada         | Longitudinal study                                 | Dental personnel                                                                                         | Adults                | Diagnostic and preventive | 1 year           |
| 6. Milsom et al. 2014 <sup>68</sup>           | UK             | Retrospective study using administrative data      | Dental personnel                                                                                         | Children              | Diagnostic and preventive | 4 years          |
| 7. Ortuno Borroto et al. 2021 <sup>109</sup>  | Chile          | Prospective cohort                                 | Dental personnel                                                                                         | Adults and Elders     | Interventional            | N/A              |
| <b>Reviews</b>                                |                |                                                    |                                                                                                          |                       |                           |                  |
| 1. Henry et al. 2017 <sup>61</sup>            | Not applicable | Systematic review                                  | N/A                                                                                                      | Children and adults   | OHE                       | N/A              |

| Author(s), year                    | Country        | Study design      | Personnel category                                                                               | Target group category    | Program type | Follow-up period   |
|------------------------------------|----------------|-------------------|--------------------------------------------------------------------------------------------------|--------------------------|--------------|--------------------|
| 2. Nakre et al. 2013 <sup>60</sup> | Not applicable | Systematic review | Non-healthcare personnel                                                                         | Children, adults, elders | OHE          | N/A                |
| 3. Seo and Kim 2020 <sup>57</sup>  | Not applicable | Systematic review | <ul style="list-style-type: none"> <li>Healthcare personnel</li> <li>Dental personnel</li> </ul> | Elders                   | OHE          | 8 weeks – 3 months |
| 4. Stein et al. 2016 <sup>58</sup> | Not applicable | Systematic review | Dental personnel                                                                                 | Children and Adolescents | OHE          | N/A                |
| 5. Wang et al. 2015 <sup>59</sup>  | Not applicable | Systematic review | Dental personnel                                                                                 | Elders                   | OHE          | N/A                |

\* Reported in medical and dental settings, j Reported in school and medical settings, 2 Reported in Community-based setting and dental settings
