# Supplementary material
Source: MDPI journal article supplement (https://www.mdpi.com/2304-6767/11/2/33)
Supplement: s1 [file s1]

## **Supplementary file 1. The search strategy**

The following databases were searched: MEDLINE, Embase, and CINAHL. MEDLINE and Embase were searched using the Ovid interface. CINAHL was searched using the EBSCO interface. The MEDLINE search strategy was developed, and peer reviewed using the PRESS standard. The MEDLINE search was then adapted for the other databases.

Searches in MEDLINE, Embase and CINAHL were limited by study design in adherence to the scope of this review. Please see below for the detail inclusion and exclusion criteria for each database. When no appropriate filters needed are available through the databases searched, external pre-tested and published filters by using the suggested filters from InterTASC Information Specialists' Sub-Group Search Filter Resource<sup>1</sup>. In Ovid, Qualitative studies, Case-control studies and Cohort studies filters were adapted from University of Texas Health Science Center at Houston<sup>2</sup>. In CINAHL, search filters were adapted from Wilczynski's article<sup>3</sup>. Animal studies were excluded by using the animal filters available and key word search in each database. Keywords search were also used to exclude equipment or supplies or dental students or dental schools which are not within the scope of this review.

### **1. Ovid MEDLINE: Epub Ahead of Print, In-Process & Other Non-Indexed Citations, Ovid MEDLINE® Daily and Ovid MEDLINE® 1946-Present**

**Language:** English

**Subjects:** Human

---

<sup>1</sup> ISSG Search Filter Resource [Internet]. Glanville J, Lefebvre C, Wright K, editors. York (UK): The InterTASC Information Specialists' Sub-Group; 2008 [updated 2019 August 12; cited INSERT DATE]. Available from: <https://sites.google.com/a/york.ac.uk/issg-search-filters-resource/home>

<sup>2</sup> Search Filters for Various Databases [Internet]. The University of Texas Health Science Center at Houston (UTHealth), 2019. [cited 2019 12 13]. Available from: [https://libguides.sph.uth.tmc.edu/search\\_filters](https://libguides.sph.uth.tmc.edu/search_filters)

<sup>3</sup> Wilczynski NL, Marks S, Haynes RB. Search strategies for identifying qualitative studies in CINAHL. Qual Health Res., 2007; 17(5):705-10. [cited 2019 12 12]. Available from <https://journals.sagepub.com/doi/abs/10.1177/1049732306294515>.

**Age group:** No limitation

**Publication year:** after 1999

**Publication Types:** Observational Studies, Systematic Reviews, Meta-analysis

**External Filters used:** qualitative studies, cohort studies, case control studies.

**Exclusion:** equipment and supplies, all animal studies

Searched on November 18, 2021

**Records retrieved:** 34113

**Ovid MEDLINE: Epub Ahead of Print, In-Process & Other Non-Indexed Citations, Ovid MEDLINE® Daily and Ovid MEDLINE® <1946-Present>**

Search history sorted by search number ascending.

| #  | Searches                                                                                       |
|----|------------------------------------------------------------------------------------------------|
| 1  | exp Dental Care/                                                                               |
| 2  | Comprehensive Dental Care/                                                                     |
| 3  | exp Dental clinics/                                                                            |
| 4  | public health dentistry/ or community dentistry/ or fluoridation/ or health education, dental/ |
| 5  | exp Mouth rehabilitation/                                                                      |
| 6  | exp Oral diagnosis/                                                                            |
| 7  | exp General practice, dental/                                                                  |
| 8  | exp Education, Dental/                                                                         |
| 9  | exp Practice management, Dental/                                                               |
| 10 | exp Dental prophylaxis/                                                                        |
| 11 | exp Dental health services/                                                                    |
| 12 | exp Dentistry, Operative/                                                                      |
| 13 | exp Endodontics/                                                                               |
| 14 | exp Esthetics, Dental/                                                                         |

|    |                                                                                                                                                                              |
|----|------------------------------------------------------------------------------------------------------------------------------------------------------------------------------|
| 15 | exp Infection control, Dental/                                                                                                                                               |
| 16 | exp Oral surgical procedures/                                                                                                                                                |
| 17 | exp Orthodontics/                                                                                                                                                            |
| 18 | exp Oral pathology/                                                                                                                                                          |
| 19 | exp Periodontics/                                                                                                                                                            |
| 20 | exp Preventive dentistry/                                                                                                                                                    |
| 21 | exp Prosthodontics/                                                                                                                                                          |
| 22 | exp Oral surgery/                                                                                                                                                            |
| 23 | exp Oral medicine/                                                                                                                                                           |
| 24 | (care adj3 dental).tw,kf.                                                                                                                                                    |
| 25 | (dental adj3 service*).tw,kf.                                                                                                                                                |
| 26 | (dent* adj2 (check-up or health or intervention* or clinic* or treatment* or therap* or program* or practice* or education or procedure* or restorat* regenerative*)).tw,kf. |
| 27 | dental stress analys?s.tw,kf.                                                                                                                                                |
| 28 | denture*.tw,kf.                                                                                                                                                              |
| 29 | (oral adj2 care).tw,kf.                                                                                                                                                      |
| 30 | (dental health adj2 survey*).tw,kf.                                                                                                                                          |
| 31 | ((decayed or missing or filled) adj3 teeth).tw,kf.                                                                                                                           |
| 32 | (bleeding on probing adj3 gingival).tw,kf.                                                                                                                                   |
| 33 | ((periodont* or orthodontic* or prosthodont* or endodontic) adj2 (treatment* or procedure* or surger* or care)).tw,kf.                                                       |
| 34 | ((dental or t??th or periodontal) adj1 cleaning).tw,kf.                                                                                                                      |
| 35 | (endodontics or orthodontics or periodontics or prosthodontics).tw,kf.                                                                                                       |
| 36 | (orthodontia or orthodontolog* or orthodonty).tw,kf.                                                                                                                         |
| 37 | (Orthodontic adj2 (space closure or anchorage* or extrusion*)).tw,kf.                                                                                                        |
| 38 | (root canal adj1 (therap* or procedure* or obturation* or preparation* or surger*)).tw,kf.                                                                                   |
| 39 | ((pulpectom* or pulpotom* or apexification* or apex) adj1 excision*).tw,kf.                                                                                                  |
| 40 | ((oral or mouth) adj2 surg*).tw,kf.                                                                                                                                          |
| 41 | parotidectom*.tw,kf.                                                                                                                                                         |
| 42 | ((pre prosthetic or preprosthetic) adj1 surger*).tw,kf.                                                                                                                      |

|    |                                                                                                                                                                                                                                             |
|----|---------------------------------------------------------------------------------------------------------------------------------------------------------------------------------------------------------------------------------------------|
| 43 | (cavity lining* adj1 dental).tw,kf.                                                                                                                                                                                                         |
| 44 | (varnish* adj2 cavity).tw,kf.                                                                                                                                                                                                               |
| 45 | (community periodontal index of treatment needs or cpitn).tw,kf.                                                                                                                                                                            |
| 46 | ((mouth or oral) adj2 rehabilitation*).tw,kf.                                                                                                                                                                                               |
| 47 | ((diagnos* or examination*) adj1 (oral or dental)).tw,kf.                                                                                                                                                                                   |
| 48 | dental caries activity test*.tw,kf.                                                                                                                                                                                                         |
| 49 | (dental adj1 pulp test*).tw,kf.                                                                                                                                                                                                             |
| 50 | ((dental or intraoral or orthodontic) adj1 photograph*).tw,kf.                                                                                                                                                                              |
| 51 | ((dental or bitewing or tooth) adj1 (radiography or radiovisiography)).tw,kf.                                                                                                                                                               |
| 52 | (Dental adj1 (x ray or xray)).tw,kf.                                                                                                                                                                                                        |
| 53 | (fluorescence adj1 quantitative light-induced).tw,kf.                                                                                                                                                                                       |
| 54 | (community adj1 dentistry).tw,kf.                                                                                                                                                                                                           |
| 55 | ((dental or periodontal or t??th) adj1 prophylaxis).tw,kf.                                                                                                                                                                                  |
| 56 | ((supragingival or subgingival or dental or root) adj1 scaling*).tw,kf.                                                                                                                                                                     |
| 57 | ((maxillo-mandibular or maxillomandibular or oral or maxillofacial or orthognathic or jaw) adj1 surg*).tw,kf.                                                                                                                               |
| 58 | ((maxillo-mandibular or maxillomandibular or oral or maxillofacial or orthognathic) adj2 procedure*).tw,kf.                                                                                                                                 |
| 59 | (oral adj1 hygiene).tw,kf.                                                                                                                                                                                                                  |
| 60 | ((evidence-based or preventative or cosmetic or operative or prosthetic or reparative) adj2 dentistry).tw,kf.                                                                                                                               |
| 61 | (dental adj1 (esthetic* or aesthetic* or floss or device* or scaling* or brace* or hygiene* or polishing or radiology or bonding or soldering* or prosthetic*)).tw,kf.                                                                      |
| 62 | ((dental or tooth) adj3 filling*).tw,kf.                                                                                                                                                                                                    |
| 63 | ((dental or tooth or caries) adj2 prevention).tw,kf.                                                                                                                                                                                        |
| 64 | ((tooth or dental) adj1 (an?esthesia or an?esthetic* or casting*)).tw,kf.                                                                                                                                                                   |
| 65 | Jaw relation record*.tw,kf.                                                                                                                                                                                                                 |
| 66 | (Sinus adj1 (floor augmentation* or lifting*)).tw,kf.                                                                                                                                                                                       |
| 67 | (dental adj2 (implant* or prosthesis)).tw,kf.                                                                                                                                                                                               |
| 68 | ((dental or enamel) adj1 microabrasion*).tw,kf.                                                                                                                                                                                             |
| 69 | (t??th adj1 (bleaching or whitening or replantation* or reimplantation* or extrusion* or uprighting* or remineralization* or polishing or brushing or restoration* or surgery* or inlay* or preparation* or removal* or resection*)).tw,kf. |

|    |                                                                                                                  |
|----|------------------------------------------------------------------------------------------------------------------|
| 70 | (Dental adj1 (reimplantation* or replantation* or reinclusion*)).tw,kf.                                          |
| 71 | (dental adj1 infection adj1 control*).tw,kf.                                                                     |
| 72 | (apicoectom* or gingivectom* or gingivoplast* or glossectom*).tw,kf.                                             |
| 73 | ((tongue or lingual) adj1 (extirpation* or resection*)).tw,kf.                                                   |
| 74 | ((jaw or maxillomandibular) adj1 fixation*).tw,kf.                                                               |
| 75 | (mandibula* adj1 (advancement* or reconstruction* or restoration* or resection*)).tw,kf.                         |
| 76 | (mandible ostectom* or mandibulectom*).tw,kf.                                                                    |
| 77 | ((maxillofacial or mandibular) adj1 (prosthesis or implant*)).tw,kf.                                             |
| 78 | ((upper jaw or maxilla*) adj1 resection).tw,kf.                                                                  |
| 79 | maxillectom*.tw,kf.                                                                                              |
| 80 | genioplast*.tw,kf.                                                                                               |
| 81 | (chin adj2 (correction* or reconstruction* or reduction* or surgery* or operation*)).tw,kf.                      |
| 82 | (chinplast* or mentoplast*).tw,kf.                                                                               |
| 83 | ((maxillary or mandibular or alveolar) adj1 ridge augmentation*).tw,kf.                                          |
| 84 | (alveolectom* or alveoloplast* or vestibuloplast*).tw,kf.                                                        |
| 85 | ((endosseous or subperiosteal) adj2 implant*).tw,kf.                                                             |
| 86 | (alveolar adj2 graft*).tw,kf.                                                                                    |
| 87 | ((Le fort or Le fort or maxilla* or jaw or mandib*) adj2 osteotomy*).tw,kf.                                      |
| 88 | (Le fort adj1 operation*).tw,kf.                                                                                 |
| 89 | (sagittal split adj2 osteotomy*).tw,kf.                                                                          |
| 90 | (sinus adj2 augmentation*).tw,kf.                                                                                |
| 91 | ((tooth or serial) adj1 extraction*).tw,kf.                                                                      |
| 92 | Exodont*.tw,kf.                                                                                                  |
| 93 | (Molar adj1 (amputation* or extraction*)).tw,kf.                                                                 |
| 94 | odontectomy*.tw,kf.                                                                                              |
| 95 | (uvulopharyngopalatoplast* or uvulopalatoplast* or palatouvulopharyngoplast* or pharyngouvuopalatoplast*).tw,kf. |
| 96 | (dental adj1 (internal or marginal) adj1 adaptation*).tw,kf.                                                     |
| 97 | (dental adj1 internal adj1 fit*).tw,kf.                                                                          |
| 98 | (mandibular adj1 advancement).tw,kf.                                                                             |

|     |                                                                                            |
|-----|--------------------------------------------------------------------------------------------|
| 99  | (occlusal adj1 (splint* or adjustment* or equilibration*)).tw,kf.                          |
| 100 | ((fixed or activator or extraoral) adj2 appliance*).tw,kf.                                 |
| 101 | ((fixed or bonded or permanent) adj1 retainer*).tw,kf.                                     |
| 102 | ((clear aligner or herbst or bimler or andresen) adj1 appliance*).tw,kf.                   |
| 103 | (frankel adj2 regulator*).tw,kf.                                                           |
| 104 | kinetor*.tw,kf.                                                                            |
| 105 | ((function or harvold) adj1 activator*).tw,kf.                                             |
| 106 | (jasper adj1 jumper*).tw,kf.                                                               |
| 107 | bionator*.tw,kf.                                                                           |
| 108 | invisalign*.tw,kf.                                                                         |
| 109 | (crown adj1 lengthening).tw,kf.                                                            |
| 110 | (forced adj2 eruption*).tw,kf.                                                             |
| 111 | ((maxillary or palatal) adj1 expansion*).tw,kf.                                            |
| 112 | palatoplast*.tw,kf.                                                                        |
| 113 | (palate adj1 (plast* or reconstruction* or operation*)).tw,kf.                             |
| 114 | (tooth adj2 (movement* or intrusion* or depression* or care)).tw,kf.                       |
| 115 | ((oral or maxillofacial) adj3 patholog*).tw,kf.                                            |
| 116 | (periodontal adj1 (medicine* or prosthes?s or splint* or dressing* or prevention*)).tw,kf. |
| 117 | (periodontal adj2 (tissue regeneration* or debridement*)).tw,kf.                           |
| 118 | ((dental or mouth or t??th) adj1 debridement*).tw,kf.                                      |
| 119 | (root adj1 planing*).tw,kf.                                                                |
| 120 | ((subgingival or gingival) adj1 (curettage* or retraction*)).tw,kf.                        |
| 121 | fluoridation*.tw,kf.                                                                       |
| 122 | (mouth adj1 (protect* or guard)).tw,kf.                                                    |
| 123 | stomatolog*.tw,kf.                                                                         |
| 124 | (medicine adj1 oral).tw,kf.                                                                |
| 125 | or/1-124                                                                                   |
| 126 | exp Health promotion/ or Public health/ or exp Patient education as topic/                 |
| 127 | ((promotion* or campaign* or program*) adj2 health).tw,kf.                                 |
| 128 | (program* adj2 wellness).tw,kf.                                                            |

|     |                                                                           |
|-----|---------------------------------------------------------------------------|
| 129 | (head start adj1 program*).tw,kf.                                         |
| 130 | (Pathology or pathological or telepathology).tw,kf.                       |
| 131 | ((public or deliver* or system*) adj1 (health care or healthcare)).tw,kf. |
| 132 | or/126-131                                                                |
| 133 | limit 132 to dentistry journals                                           |
| 134 | exp Dentistry/                                                            |
| 135 | 132 and 134                                                               |
| 136 | 133 or 135                                                                |
| 137 | 125 or 136                                                                |
| 138 | exp Health status/                                                        |
| 139 | exp Oral health/                                                          |
| 140 | exp Critical illness/                                                     |
| 141 | exp Disease/                                                              |
| 142 | exp Comorbidity/                                                          |
| 143 | exp Cohort effect/                                                        |
| 144 | Pain/                                                                     |
| 145 | exp Acute Pain/                                                           |
| 146 | exp Chronic Pain/                                                         |
| 147 | Facial Pain/                                                              |
| 148 | exp Pain, Postoperative/                                                  |
| 149 | exp Pain, Procedural/                                                     |
| 150 | exp Pain, Referred/                                                       |
| 151 | exp Mental health/                                                        |
| 152 | Mental Disorders/                                                         |
| 153 | exp Anxiety Disorders/                                                    |
| 154 | "Feeding and Eating Disorders"/                                           |
| 155 | exp Mood Disorders/                                                       |
| 156 | Sleep/                                                                    |
| 157 | exp Apnea/                                                                |
| 158 | exp Feasibility studies/                                                  |

|     |                              |
|-----|------------------------------|
| 159 | Adaptation, Psychological/   |
| 160 | exp Emotional Adjustment/    |
| 161 | exp Feedback, Psychological/ |
| 162 | exp Orientation/             |
| 163 | Behavior/                    |
| 164 | Social behavior/             |
| 165 | exp Social adjustment/       |
| 166 | exp Social skills/           |
| 167 | exp Shyness/                 |
| 168 | exp Rejection/               |
| 169 | exp Personal satisfaction/   |
| 170 | Communication/               |
| 171 | exp Verbal behavior/         |
| 172 | Nonverbal Communication/     |
| 173 | Facial Expression/           |
| 174 | exp Smiling/                 |
| 175 | Behavioral Symptoms/         |
| 176 | exp Psychological stress/    |
| 177 | exp Habits/                  |
| 178 | Emotions/                    |
| 179 | Anxiety/                     |
| 180 | exp Dental Anxiety/          |
| 181 | Motivation/                  |
| 182 | exp Food Deprivation/        |
| 183 | Personality/                 |
| 184 | Personality Development/     |
| 185 | exp Self Concept/            |
| 186 | exp Quality of life/         |
| 187 | exp Sensation disorders/     |
| 188 | exp Eating/                  |



|     |                                                                                                                                                                                                                                     |
|-----|-------------------------------------------------------------------------------------------------------------------------------------------------------------------------------------------------------------------------------------|
| 189 | exp Body Mass Index/                                                                                                                                                                                                                |
| 190 | Body Size/                                                                                                                                                                                                                          |
| 191 | exp Body Weight/                                                                                                                                                                                                                    |
| 192 | exp Chronic disease/                                                                                                                                                                                                                |
| 193 | exp Saliva/                                                                                                                                                                                                                         |
| 194 | exp Sepsis/                                                                                                                                                                                                                         |
| 195 | exp Value of life/                                                                                                                                                                                                                  |
| 196 | exp Family health/                                                                                                                                                                                                                  |
| 197 | exp family relations/                                                                                                                                                                                                               |
| 198 | exp Interpersonal relations/                                                                                                                                                                                                        |
| 199 | exp Social isolation/                                                                                                                                                                                                               |
| 200 | exp periodontal diseases/                                                                                                                                                                                                           |
| 201 | tooth diseases/ or exp dental leakage/ or dentin sensitivity/ or fluorosis, dental/ or focal infection, dental/<br>or exp mouth, edentulous/ or exp tooth demineralization/ or tooth discoloration/ or tooth loss/ or<br>toothache/ |
| 202 | or/138-201                                                                                                                                                                                                                          |
| 203 | ((health or disease*) adj2 (oral or mouth or dental)).tw,kf.                                                                                                                                                                        |
| 204 | ((participat* or involvement* or action*) adj1 (community or consumer or public)).tw,kf.                                                                                                                                            |
| 205 | (patient adj2 outcome measures).tw,kf.                                                                                                                                                                                              |
| 206 | (self report or patient acuity or illness index or performance status or sickness impact profile or geriatric<br>assessment).tw,kf.                                                                                                 |
| 207 | ((dysfunction or physiology) adj score*).tw,kf.                                                                                                                                                                                     |
| 208 | ((mass or multiphasic or neonatal) adj screening*).tw,kf.                                                                                                                                                                           |
| 209 | ((public health or population or sentinel or behavioral risk factor) adj surveillance).tw,kf.                                                                                                                                       |
| 210 | ((oral or health) adj3 complication*).tw,kf.                                                                                                                                                                                        |
| 211 | ((health or functional) adj2 (level* or status*)).tw,kf.                                                                                                                                                                            |
| 212 | (health disparity or physical mobility).tw,kf.                                                                                                                                                                                      |
| 213 | oral health.tw,kf.                                                                                                                                                                                                                  |
| 214 | (oral adj6 life).tw,kf.                                                                                                                                                                                                             |
| 215 | (health adj2 social determinant*).tw,kf.                                                                                                                                                                                            |

|     |                                                                                                                                                                                           |
|-----|-------------------------------------------------------------------------------------------------------------------------------------------------------------------------------------------|
| 216 | (hrqol or (quality adj3 life)).tw,kf.                                                                                                                                                     |
| 217 | (appraisal* adj1 health risk).tw,kf.                                                                                                                                                      |
| 218 | (health status adj1 (index* or indicator* or indices)).tw,kf.                                                                                                                             |
| 219 | (apache or (acute physiology and chronic health evaluation)).tw,kf.                                                                                                                       |
| 220 | (acuit* adj1 patient).tw,kf.                                                                                                                                                              |
| 221 | (impact profile* adj1 sickness).tw,kf.                                                                                                                                                    |
| 222 | (cost* adj2 (disease* or illness or sickness)).tw,kf.                                                                                                                                     |
| 223 | (critical adj1 ill*).tw,kf.                                                                                                                                                               |
| 224 | comorbidity.tw,kf.                                                                                                                                                                        |
| 225 | multimorbidity.tw,kf.                                                                                                                                                                     |
| 226 | ((cohort or generation) adj1 effect*).tw,kf.                                                                                                                                              |
| 227 | ache*.tw,kf.                                                                                                                                                                              |
| 228 | (physical adj1 suffering*).tw,kf.                                                                                                                                                         |
| 229 | physical functioning.tw,kf.                                                                                                                                                               |
| 230 | vitality.tw,kf.                                                                                                                                                                           |
| 231 | ((physical or psychic) adj health).tw,kf.                                                                                                                                                 |
| 232 | (postherpetic adj1 neuralgia).tw,kf.                                                                                                                                                      |
| 233 | (pain* adj2 (nociceptive or tissue or somatic or visceral or postoperative or post operation or procedural or referred)).tw,kf.                                                           |
| 234 | ((sensation* or limb* or pain) adj2 phantom).tw,kf.                                                                                                                                       |
| 235 | ((acute or chronic or face or facial or craniofacial or myofacial or orofacial or physical or splitting or radiating or migratory or crushing or burning or malignant) adj2 pain*).tw,kf. |
| 236 | (oral adj3 pain).tw,kf.                                                                                                                                                                   |
| 237 | chronic pain.tw,kf.                                                                                                                                                                       |
| 238 | (pain adj2 (management or measurement*)).tw,kf.                                                                                                                                           |
| 239 | (adl or self-care or worry or depression*).tw,kf.                                                                                                                                         |
| 240 | (activit* adj3 (daily living or limitation*)).tw,kf.                                                                                                                                      |
| 241 | ((care or administration* medication* or management or neglect or help or treatment*) adj1 self).tw,kf.                                                                                   |
| 242 | (selfcare or selfmanagement).tw,kf.                                                                                                                                                       |
| 243 | aging in place.tw,kf.                                                                                                                                                                     |

|     |                                                                                                                                      |
|-----|--------------------------------------------------------------------------------------------------------------------------------------|
| 244 | (community adj1 dwelling*).tw,kf.                                                                                                    |
| 245 | (independent adj1 living).tw,kf.                                                                                                     |
| 246 | (participation adj1 social).tw,kf.                                                                                                   |
| 247 | (depressive adj1 symptom*).tw,kf.                                                                                                    |
| 248 | (diagnosis adj1 psychiatric).tw,kf.                                                                                                  |
| 249 | ((effort or distress) adj1 syndrome).tw,kf.                                                                                          |
| 250 | ((disorder* or obsessive) adj1 hoarding).tw,kf.                                                                                      |
| 251 | ((disorder* or neuros?s) adj1 phobic).tw,kf.                                                                                         |
| 252 | (mood adj (disturbance* or change)).tw,kf.                                                                                           |
| 253 | (fear or frustration or happ* or hope* or helplessness or anger or pleasure or unhapp* or motivation or aspiration* or goal*).tw,kf. |
| 254 | (affective adj (illness or neuros?s or psychos?s)).tw,kf.                                                                            |
| 255 | (cyclothymic adj1 personalit*).tw,kf.                                                                                                |
| 256 | (depression* adj1 (endogenous or neurotic or unipolar or postnatal or post-partum)).tw,kf.                                           |
| 257 | (depressive adj1 (syndrome* or disorders)).tw,kf.                                                                                    |
| 258 | ((disorder or depression) adj3 dysthymic).tw,kf.                                                                                     |
| 259 | ((dental or t??th) adj1 (grinding or clenching)).tw,kf.                                                                              |
| 260 | (insufficient adj1 sleep syndrome*).tw,kf.                                                                                           |
| 261 | ((health or condition or disorder*) adj2 (mental or behavio?r*)).tw,kf.                                                              |
| 262 | (mental adj (hygiene or care or factor or help or service or state or status)).tw,kf.                                                |
| 263 | (mental adj1 (disease or illness)).tw,kf.                                                                                            |
| 264 | (mental adj (abnormality or change or confusion or defect or disturbance or insufficiency or symptom)).tw,kf.                        |
| 265 | ((patient or personal) adj2 satisfaction).tw,kf.                                                                                     |
| 266 | (patient* adj2 preference*).tw,kf.                                                                                                   |
| 267 | (anxiety* or hypervigilance or nervousness or odontophobia* or uncomfortable or catastrophizing or psychasthenia).tw,kf.             |
| 268 | (apnea* or apnoea or parasomnia*).tw,kf.                                                                                             |
| 269 | (hypopnea* adj2 sleep).tw,kf.                                                                                                        |
| 270 | (feasibility adj1 stud*).tw,kf.                                                                                                      |

|     |                                                                                                                                                                                         |
|-----|-----------------------------------------------------------------------------------------------------------------------------------------------------------------------------------------|
| 271 | smiling*.tw,kf.                                                                                                                                                                         |
| 272 | ((perception* or esteem* or confidence or concept or awareness or confrontation or image or rating or representation or actualization or disclosure or transcendence) adj1 self).tw,kf. |
| 273 | (Selfconcept or ego or Personal appearance or professional image or Superego or sense of coherence).tw,kf.                                                                              |
| 274 | ((impairment* or disorder* or disability* or disturbance) adj1 (vision or visual)).tw,kf.                                                                                               |
| 275 | (Visual adj (illusion or hallucination)).tw,kf.                                                                                                                                         |
| 276 | ((sensation or sensory or senses) adj1 (disorder* or impairment*)).tw,kf.                                                                                                               |
| 277 | (abnormal sensation or dizziness).tw,kf.                                                                                                                                                |
| 278 | (hearing adj2 (impairment* or loss or disorder*)).tw,kf.                                                                                                                                |
| 279 | hypoacus?s.tw,kf.                                                                                                                                                                       |
| 280 | ((bilateral or acquired or prelingual) adj1 deaf*).tw,kf.                                                                                                                               |
| 281 | ((extreme or complete) adj1 hearing loss).tw,kf.                                                                                                                                        |
| 282 | deaf mutism.tw,kf.                                                                                                                                                                      |
| 283 | ((behavior?r or interaction or expression or interaction or communication) adj1 verbal).tw,kf.                                                                                          |
| 284 | (abilit* adj2 (speak or eat or sleep)).tw,kf.                                                                                                                                           |
| 285 | ((((eating or ingestion) adj2 disorder*) or ednos).tw,kf.                                                                                                                               |
| 286 | (food adj1 intake).tw,kf.                                                                                                                                                               |
| 287 | (drinking* or water intake).tw,kf.                                                                                                                                                      |
| 288 | (chewing or mastication or obesity or habit* or overweight).tw,kf.                                                                                                                      |
| 289 | (finger sucking or fingersucking).tw,kf.                                                                                                                                                |
| 290 | (nail biting or nailbiting).tw,kf.                                                                                                                                                      |
| 291 | (Onychophagy or tongue habits).tw,kf.                                                                                                                                                   |
| 292 | (body adj3 measure*).tw,kf.                                                                                                                                                             |
| 293 | ((((body mass or quetelet*) adj1 index) or BMI).tw,kf.                                                                                                                                  |
| 294 | (body adj1 (weight* or image)).tw,kf.                                                                                                                                                   |
| 295 | (leanness or thinness or underweight).tw,kf.                                                                                                                                            |
| 296 | (chronic adj2 (disease* or ill* or condition*)).tw,kf.                                                                                                                                  |
| 297 | ((medical or oral) adj4 condition*).tw,kf.                                                                                                                                              |
| 298 | ((dental plaque or dmf or gingival or periodontal) adj1 (index* or indices)).tw,kf.                                                                                                     |

|     |                                                                                                             |
|-----|-------------------------------------------------------------------------------------------------------------|
| 299 | (oral hygiene adj1 (index* or indices)).tw,kf.                                                              |
| 300 | (dentin* adj1 secondary).tw,kf.                                                                             |
| 301 | (pulpitis or pulpitudes).tw,kf.                                                                             |
| 302 | (inflammation* adj1 endodontic).tw,kf.                                                                      |
| 303 | (t??th adj1 (endodontically treated or nonvital or devitalized or pulpless)).tw,kf.                         |
| 304 | ((sensitivit* or hypersensitivit*) adj1 (dentin or dentine or t??th)).tw,kf.                                |
| 305 | ((focal adj1 infection*) or fluoros?s or overjet) adj1 dental).tw,kf.                                       |
| 306 | (mottled adj1 enamel*).tw,kf.                                                                               |
| 307 | ((t??th or dentoalveolar or dental) adj2 ankylos?s).tw,kf.                                                  |
| 308 | ((decay or caries or fissure*) adj2 dental).tw,kf.                                                          |
| 309 | (caries adj2 stage*).tw,kf.                                                                                 |
| 310 | (white adj1 spot*).tw,kf.                                                                                   |
| 311 | (dental adj3 spot*).tw,kf.                                                                                  |
| 312 | (cariou adj2 dentin*).tw,kf.                                                                                |
| 313 | ((cary or caries) adj2 (cervical or root)).tw,kf.                                                           |
| 314 | (odontalgia* or toothache* or tooth pain).tw,kf.                                                            |
| 315 | (disease* adj2 non communicable).tw,kf.                                                                     |
| 316 | non infectious disease*.tw,kf.                                                                              |
| 317 | (dental adj1 plaque).tw,kf.                                                                                 |
| 318 | sepsis.tw,kf.                                                                                               |
| 319 | ((periodontal or periapical) adj1 disease*).tw,kf.                                                          |
| 320 | (disease* adj1 gingival).tw,kf.                                                                             |
| 321 | (periodontiti* or periodontos?s or pericementitis or gingiviti* or fusospirillos?s or pericoroniti*).tw,kf. |
| 322 | (pocket* adj1 gingival).tw,kf.                                                                              |
| 323 | (gingiv* adj2 (atroph* or recession*)).tw,kf.                                                               |
| 324 | ((alveolar or periodont*) adj2 (bone loss* or atroph* or resorption)).tw,kf.                                |
| 325 | (periodontal attachment adj1 loss).tw,kf.                                                                   |
| 326 | ((periodontal or gingival) adj1 (abscess* or pocket*)).tw,kf.                                               |
| 327 | suffering*.tw,kf.                                                                                           |

|     |                                                                                                                            |
|-----|----------------------------------------------------------------------------------------------------------------------------|
| 328 | ((psychologic* or life or emotional or disorder* or management or mental or psychic or psycho social) adj1 stress*).tw,kf. |
| 329 | (emotional adj (factor or response or status or structure)).tw,kf.                                                         |
| 330 | emotion*.tw,kf.                                                                                                            |
| 331 | ((Mental or psychic) adj1 Tension).tw,kf.                                                                                  |
| 332 | schizotypal personality.tw,kf.                                                                                             |
| 333 | (personality adj1 (characteristic or pattern or structure or type)).tw,kf.                                                 |
| 334 | (burn out or burnout).tw,kf.                                                                                               |
| 335 | ((work place or workplace or work or job or occupational or professional) adj2 stress*).tw,kf.                             |
| 336 | (saliva* or spittle).tw,kf.                                                                                                |
| 337 | (blood adj1 poisoning*).tw,kf.                                                                                             |
| 338 | (seps?s or septicemia* or bacteremia* or fungemia*).tw,kf.                                                                 |
| 339 | ((endotoxic or septic or toxic) adj1 shock).tw,kf.                                                                         |
| 340 | ((right or respect or sanctit* or value) adj2 life).tw,kf.                                                                 |
| 341 | (family adj1 planning).tw,kf.                                                                                              |
| 342 | (family adj1 allowance*).tw,kf.                                                                                            |
| 343 | (family adj2 health).tw,kf.                                                                                                |
| 344 | (family adj5 life).tw,kf.                                                                                                  |
| 345 | (family adj3 well*).tw,kf.                                                                                                 |
| 346 | (family adj1 (dynamic* or relation* or interaction* or outcome* or histor*)).tw,kf.                                        |
| 347 | ((family or interparental or marital) adj1 conflict*).tw,kf.                                                               |
| 348 | (family adj2 relation*).tw,kf.                                                                                             |
| 349 | or/203-348                                                                                                                 |
| 350 | 202 or 349                                                                                                                 |
| 351 | 137 and 350                                                                                                                |
| 352 | limit 351 to animals                                                                                                       |
| 353 | 351 not 352                                                                                                                |
| 354 | limit 353 to (english language and yr="1999 -Current" and journal article)                                                 |
| 355 | limit 354 to (meta analysis or observational study or "systematic review")                                                 |

|     |                                                                                                                                                                                                                                                                                                                                                                                   |
|-----|-----------------------------------------------------------------------------------------------------------------------------------------------------------------------------------------------------------------------------------------------------------------------------------------------------------------------------------------------------------------------------------|
| 356 | ((("semi-structured" or semistructured or unstructured or informal or "in-depth" or indepth or "face-to-face" or structured or guide) adj3 (interview* or discussion* or questionnaire*)) or (focus group* or qualitative or ethnograph* or fieldwork or "field work" or "key informant")).ti,ab. or interviews as topic/ or focus groups/ or narration/ or qualitative research/ |
| 357 | Case-Control Studies/ or Control Groups/ or Matched-Pair Analysis/ or ((case* adj5 control*) or (case adj3 comparison*) or control group*).ti,ab.                                                                                                                                                                                                                                 |
| 358 | cohort studies/ or longitudinal studies/ or follow-up studies/ or prospective studies/ or retrospective studies/ or cohort.ti,ab. or longitudinal.ti,ab. or prospective.ti,ab. or retrospective.ti,ab.                                                                                                                                                                            |
| 359 | 356 or 357 or 358                                                                                                                                                                                                                                                                                                                                                                 |
| 360 | 354 and 359                                                                                                                                                                                                                                                                                                                                                                       |
| 361 | 355 or 360                                                                                                                                                                                                                                                                                                                                                                        |
| 362 | (rats or rat or mice or dog* or pig* or horse* or dog* or mouse or rabbit* or Animal*).tw,kf.                                                                                                                                                                                                                                                                                     |
| 363 | (Equipment* or instrument* or device* or supply or supplies or t??th brush* or t??thbrush or tooth paste or toothpaste or versus).ti.                                                                                                                                                                                                                                             |
| 364 | (dental adj1 (student* or school* or university or universities or college*)).tw,kf.                                                                                                                                                                                                                                                                                              |
| 365 | 362 or 363 or 364                                                                                                                                                                                                                                                                                                                                                                 |
| 366 | 361 not 365                                                                                                                                                                                                                                                                                                                                                                       |

### Key

/ = indexing term (MeSH heading)

exp = exploded indexing term (MeSH heading)

\$ = truncation

tw = text word search in title or abstract fields

kf = terms in author provided keyword

pt = publication type

adjn = terms within (n-1) words of each other (any order)

## 2. EMBASE:

**Language:** English

**Subjects:** Not animals

**Age group:** No limitation

**Publication year:** after 1999

**Clinical Queries:** "qualitative (best balance of sensitivity and specificity)"

**External Filters used:** cohort studies, case control studies

**EBM-Evidence Based Medicine:** all

**Exclusion:** equipment and supplies, all animal studies

Searched on November 18, 2021

**Records retrieved:** 51195

**Embase Classic + Embase <1947 to 2021 November 18>**

Search history sorted by search number ascending.

| # | Searches                 |
|---|--------------------------|
| 1 | exp dental procedure/    |
| 2 | dental clinics/          |
| 3 | dental health education/ |
| 4 | exp Dental prophylaxis/  |
| 5 | operative dentistry/     |
| 6 | Endodontics/             |
| 7 | Orthodontics/            |
| 8 | Periodontics/            |
| 9 | Preventive dentistry/    |



|    |                                                                                                                                                                              |
|----|------------------------------------------------------------------------------------------------------------------------------------------------------------------------------|
| 10 | Prosthodontics/                                                                                                                                                              |
| 11 | exp Oral surgery/                                                                                                                                                            |
| 12 | (care adj3 dental).tw,kw.                                                                                                                                                    |
| 13 | (dental adj3 service*).tw,kw.                                                                                                                                                |
| 14 | (dent* adj2 (check-up or health or intervention* or clinic* or treatment* or therap* or program* or practice* or education or procedure* or restorat* regenerative*)).tw,kw. |
| 15 | dental stress analys?s.tw,kw.                                                                                                                                                |
| 16 | denture*.tw,kw.                                                                                                                                                              |
| 17 | (oral adj2 care).tw,kw.                                                                                                                                                      |
| 18 | (dental health adj2 survey*).tw,kw.                                                                                                                                          |
| 19 | ((decayed or missing or filled) adj3 teeth).tw,kw.                                                                                                                           |
| 20 | (bleeding on probing adj3 gingival).tw,kw.                                                                                                                                   |
| 21 | ((periodont* or orthodontic* or prosthodont* or endodontic) adj2 (treatment* or procedure* or surger* or care)).tw,kw.                                                       |
| 22 | ((dental or t??th or periodontal) adj1 cleaning).tw,kw.                                                                                                                      |
| 23 | (endodontics or orthodontics or periodontics or prosthodontics).tw,kw.                                                                                                       |
| 24 | (orthodontia or orthodontolog* or orthodonty).tw,kw.                                                                                                                         |
| 25 | (Orthodontic adj2 (space closure or anchorage* or extrusion*)).tw,kw.                                                                                                        |
| 26 | (root canal adj1 (therap* or procedure* or obturation* or preparation* or surger*)).tw,kw.                                                                                   |
| 27 | ((pulpectom* or pulpotom* or apexification* or apex) adj1 excision*).tw,kw.                                                                                                  |
| 28 | ((oral or mouth) adj2 surg*).tw,kw.                                                                                                                                          |
| 29 | parotidectom*.tw,kw.                                                                                                                                                         |
| 30 | ((pre prosthetic or preprosthetic) adj1 surger*).tw,kw.                                                                                                                      |
| 31 | (cavity lining* adj1 dental).tw,kw.                                                                                                                                          |
| 32 | (varnish* adj2 cavity).tw,kw.                                                                                                                                                |
| 33 | (community periodontal index of treatment needs or cpitn).tw,kw.                                                                                                             |
| 34 | ((mouth or oral) adj2 rehabilitation*).tw,kw.                                                                                                                                |
| 35 | ((diagnos* or examination*) adj1 (oral or dental)).tw,kw.                                                                                                                    |
| 36 | dental caries activity test*.tw,kw.                                                                                                                                          |
| 37 | (dental adj1 pulp test*).tw,kw.                                                                                                                                              |

|    |                                                                                                                                                                                                                                             |
|----|---------------------------------------------------------------------------------------------------------------------------------------------------------------------------------------------------------------------------------------------|
| 38 | ((dental or intraoral or orthodontic) adj1 photograph*).tw,kw.                                                                                                                                                                              |
| 39 | ((dental or bitewing or tooth) adj1 (radiography or radiovisiography)).tw,kw.                                                                                                                                                               |
| 40 | (Dental adj1 (x ray or xray)).tw,kw.                                                                                                                                                                                                        |
| 41 | (fluorescence adj1 quantitative light-induced).tw,kw.                                                                                                                                                                                       |
| 42 | (community adj1 dentistry).tw,kw.                                                                                                                                                                                                           |
| 43 | ((dental or periodontal or t??th) adj1 prophylaxis).tw,kw.                                                                                                                                                                                  |
| 44 | ((supragingival or subgingival or dental or root) adj1 scaling*).tw,kw.                                                                                                                                                                     |
| 45 | ((maxillo-mandibular or maxillomandibular or oral or maxillofacial or orthognathic or jaw) adj1 surg*).tw,kw.                                                                                                                               |
| 46 | ((maxillo-mandibular or maxillomandibular or oral or maxillofacial or orthognathic) adj2 procedure*).tw,kw.                                                                                                                                 |
| 47 | (oral adj1 hygiene).tw,kw.                                                                                                                                                                                                                  |
| 48 | ((evidence-based or preventative or cosmetic or operative or prosthetic or reparative) adj2 dentistry).tw,kw.                                                                                                                               |
| 49 | (dental adj1 (esthetic* or aesthetic* or floss or device* or scaling* or brace* or hygiene* or polishing or radiology or bonding or soldering* or prosthetic*)).tw,kw.                                                                      |
| 50 | ((dental or tooth) adj3 filling*).tw,kw.                                                                                                                                                                                                    |
| 51 | ((dental or tooth or caries) adj2 prevention).tw,kw.                                                                                                                                                                                        |
| 52 | ((tooth or dental) adj1 (an?esthesia or an?esthetic* or casting*)).tw,kw.                                                                                                                                                                   |
| 53 | Jaw relation record*.tw,kw.                                                                                                                                                                                                                 |
| 54 | (Sinus adj1 (floor augmentation* or lifting*)).tw,kw.                                                                                                                                                                                       |
| 55 | (dental adj2 (implant* or prosthesis)).tw,kw.                                                                                                                                                                                               |
| 56 | ((dental or enamel) adj1 microabrasion*).tw,kw.                                                                                                                                                                                             |
| 57 | (t??th adj1 (bleaching or whitening or replantation* or reimplantation* or extrusion* or uprighting* or remineralization* or polishing or brushing or restoration* or surgery* or inlay* or preparation* or removal* or resection*)).tw,kw. |
| 58 | (Dental adj1 (reimplantation* or replantation* or reinclusion*)).tw,kw.                                                                                                                                                                     |
| 59 | (dental adj1 infection adj1 control*).tw,kw.                                                                                                                                                                                                |
| 60 | (apicoectom* or gingivectom* or gingivoplast* or glossectom*).tw,kw.                                                                                                                                                                        |
| 61 | ((tongue or lingual) adj1 (extirpation* or resection*)).tw,kw.                                                                                                                                                                              |
| 62 | ((jaw or maxillomandibular) adj1 fixation*).tw,kw.                                                                                                                                                                                          |

|    |                                                                                                                   |
|----|-------------------------------------------------------------------------------------------------------------------|
| 63 | (mandibula* adj1 (advancement* or reconstruction* or restoration* or resection*)).tw,kw.                          |
| 64 | (mandible ostectom* or mandibulectom*).tw,kw.                                                                     |
| 65 | ((maxillofacial or mandibular) adj1 (prosthesis or implant*)).tw,kw.                                              |
| 66 | ((upper jaw or maxilla*) adj1 resection).tw,kw.                                                                   |
| 67 | maxillectom*.tw,kw.                                                                                               |
| 68 | genioplast*.tw,kw.                                                                                                |
| 69 | (chin adj2 (correction* or reconstruction* or reduction* or surgery* or operation*)).tw,kw.                       |
| 70 | (chinplast* or mentoplast*).tw,kw.                                                                                |
| 71 | ((maxillary or mandibular or alveolar) adj1 ridge augmentation*).tw,kw.                                           |
| 72 | (alveolectom* or alveoplast* or vestibuloplast*).tw,kw.                                                           |
| 73 | ((endosseous or subperiosteal) adj2 implant*).tw,kw.                                                              |
| 74 | (alveolar adj2 graft*).tw,kw.                                                                                     |
| 75 | ((Le fort or Le fort or maxilla* or jaw or mandib*) adj2 osteotomy*).tw,kw.                                       |
| 76 | (Le fort adj1 operation*).tw,kw.                                                                                  |
| 77 | (sagittal split adj2 osteotomy*).tw,kw.                                                                           |
| 78 | (sinus adj2 augmentation*).tw,kw.                                                                                 |
| 79 | ((third or serial) adj1 extraction*).tw,kw.                                                                       |
| 80 | Exodont*.tw,kw.                                                                                                   |
| 81 | (Molar adj1 (amputation* or extraction*)).tw,kw.                                                                  |
| 82 | odontectomy*.tw,kw.                                                                                               |
| 83 | (uvulopharyngopalatoplast* or uvulopalatoplast* or palatouvulopharyngoplast* or pharyngouvulopalatoplast*).tw,kw. |
| 84 | (dental adj1 (internal or marginal) adj1 adaptation*).tw,kw.                                                      |
| 85 | (dental adj1 internal adj1 fit*).tw,kw.                                                                           |
| 86 | (mandibular adj1 advancement).tw,kw.                                                                              |
| 87 | (occlusal adj1 (splint* or adjustment* or equilibration*)).tw,kw.                                                 |
| 88 | ((fixed or activator or extraoral) adj2 appliance*).tw,kw.                                                        |
| 89 | ((fixed or bonded or permanent) adj1 retainer*).tw,kw.                                                            |
| 90 | ((clear aligner or Herbst or Bräker or Andresen) adj1 appliance*).tw,kw.                                          |
| 91 | (Frankel adj2 regulator*).tw,kw.                                                                                  |

|     |                                                                                            |
|-----|--------------------------------------------------------------------------------------------|
| 92  | kinetor*.tw,kw.                                                                            |
| 93  | ((function or harvold) adj1 activator*).tw,kw.                                             |
| 94  | (jasper adj1 jumper*).tw,kw.                                                               |
| 95  | bionator*.tw,kw.                                                                           |
| 96  | invisalign*.tw,kw.                                                                         |
| 97  | (crown adj1 lengthening).tw,kw.                                                            |
| 98  | (forced adj2 eruption*).tw,kw.                                                             |
| 99  | ((maxillary or palatal) adj1 expansion*).tw,kw.                                            |
| 100 | palatoplast*.tw,kw.                                                                        |
| 101 | (palate adj1 (plast* or reconstruction* or operation*)).tw,kw.                             |
| 102 | (tooth adj2 (movement* or intrusion* or depression* or care)).tw,kw.                       |
| 103 | ((oral or maxillofacial) adj3 patholog*).tw,kw.                                            |
| 104 | (periodontal adj1 (medicine* or prosthes?s or splint* or dressing* or prevention*)).tw,kw. |
| 105 | (periodontal adj2 (tissue regeneration* or debridement*)).tw,kw.                           |
| 106 | ((dental or mouth or t??th) adj1 debridement*).tw,kw.                                      |
| 107 | (root adj1 planing*).tw,kw.                                                                |
| 108 | ((subgingival or gingival) adj1 (curettage* or retraction*)).tw,kw.                        |
| 109 | fluoridation*.tw,kw.                                                                       |
| 110 | (mouth adj1 (protect* or guard)).tw,kw.                                                    |
| 111 | stomatolog*.tw,kw.                                                                         |
| 112 | (medicine adj1 oral).tw,kw.                                                                |
| 113 | or/1-112                                                                                   |
| 114 | exp Health promotion/                                                                      |
| 115 | exp Infection control/                                                                     |
| 116 | exp pathology/                                                                             |
| 117 | Public health/                                                                             |
| 118 | ((promotion* or campaign* or program*) adj2 health).tw,kw.                                 |
| 119 | (program* adj2 wellness).tw,kw.                                                            |
| 120 | (head start adj1 program*).tw,kw.                                                          |
| 121 | (Pathology or pathological or telepathology).tw,kw.                                        |

|     |                                                                                              |
|-----|----------------------------------------------------------------------------------------------|
| 122 | ((public or deliver* or system*) adj1 (health care or healthcare)).tw,kw.                    |
| 123 | or/114-122                                                                                   |
| 124 | exp dentistry/                                                                               |
| 125 | 123 and 124                                                                                  |
| 126 | 113 or 125                                                                                   |
| 127 | exp Health status/                                                                           |
| 128 | exp Oral health/                                                                             |
| 129 | exp Critical illness/                                                                        |
| 130 | exp Disease/                                                                                 |
| 131 | exp Comorbidity/                                                                             |
| 132 | exp Cohort effect/                                                                           |
| 133 | Pain/                                                                                        |
| 134 | exp Chronic Pain/                                                                            |
| 135 | face pain/                                                                                   |
| 136 | exp Postoperative pain/                                                                      |
| 137 | exp Procedural pain/                                                                         |
| 138 | exp Referred pain/                                                                           |
| 139 | exp Mental health/                                                                           |
| 140 | mental disease/                                                                              |
| 141 | exp Anxiety Disorders/                                                                       |
| 142 | Eating Disorders/                                                                            |
| 143 | exp Mood Disorders/                                                                          |
| 144 | Sleep Disorders/                                                                             |
| 145 | Sleep Deprivation/                                                                           |
| 146 | exp Bruxism/                                                                                 |
| 147 | exp drug dependence/                                                                         |
| 148 | Sleep/                                                                                       |
| 149 | apnea/ or apnea attack/ or apparent life threatening event/ or central sleep apnea syndrome/ |
| 150 | Feasibility studies/                                                                         |
| 151 | exp coping behavior/                                                                         |

|     |                                                                                                                                     |
|-----|-------------------------------------------------------------------------------------------------------------------------------------|
| 152 | psychological adjustment/                                                                                                           |
| 153 | Feedback, Psychological/                                                                                                            |
| 154 | exp Orientation/                                                                                                                    |
| 155 | Behavior/                                                                                                                           |
| 156 | Shyness/                                                                                                                            |
| 157 | exp satisfaction/                                                                                                                   |
| 158 | interpersonal communication/                                                                                                        |
| 159 | exp Verbal behavior/                                                                                                                |
| 160 | nonverbal communication/ or exp facial expression/                                                                                  |
| 161 | exp health behavior/                                                                                                                |
| 162 | Habit/                                                                                                                              |
| 163 | exp Emotion/                                                                                                                        |
| 164 | Motivation/                                                                                                                         |
| 165 | exp Food Deprivation/                                                                                                               |
| 166 | Personality/                                                                                                                        |
| 167 | exp Self Concept/                                                                                                                   |
| 168 | exp Quality of life/                                                                                                                |
| 169 | exp Eating/                                                                                                                         |
| 170 | Body Mass/                                                                                                                          |
| 171 | Body Size/                                                                                                                          |
| 172 | exp Body Weight/                                                                                                                    |
| 173 | exp Chronic disease/                                                                                                                |
| 174 | Saliva/                                                                                                                             |
| 175 | Sepsis/                                                                                                                             |
| 176 | Family health/                                                                                                                      |
| 177 | exp Family relation/                                                                                                                |
| 178 | exp Social Isolation/                                                                                                               |
| 179 | mouth diseases/ or mouth infection/ or xerostomia/ or exp lip diseases/ or exp oral fistula/ or mouth ulcer/ or exp tongue disease/ |

|     |                                                                                                                                                                                                                       |
|-----|-----------------------------------------------------------------------------------------------------------------------------------------------------------------------------------------------------------------------|
| 180 | tooth disease/ or exp dental caries/ or dental fluorosis/ or dentin sensitivity/ or edentulousness/ or exp periodontal disease/ or tooth discoloration/ or exp tooth infection/ or tooth pain/ or tooth pulp disease/ |
| 181 | ((health or disease*) adj2 (oral or mouth or dental)).tw,kw.                                                                                                                                                          |
| 182 | ((participat* or involvement* or action*) adj1 (community or consumer or public)).tw,kw.                                                                                                                              |
| 183 | (patient adj2 outcome measures).tw,kw.                                                                                                                                                                                |
| 184 | (self report or patient acuity or illness index or performance status or sickness impact profile or geriatric assessment).tw,kw.                                                                                      |
| 185 | ((dysfunction or physiology) adj score*).tw,kw.                                                                                                                                                                       |
| 186 | ((mass or multiphasic or neonatal) adj screening*).tw,kw.                                                                                                                                                             |
| 187 | ((public health or population or sentinel or behavioral risk factor) adj surveillance).tw,kw.                                                                                                                         |
| 188 | ((oral or health) adj3 complication*).tw,kw.                                                                                                                                                                          |
| 189 | ((health or functional) adj2 (level* or status*)).tw,kw.                                                                                                                                                              |
| 190 | (health disparity or physical mobility).tw,kw.                                                                                                                                                                        |
| 191 | oral health.tw,kw.                                                                                                                                                                                                    |
| 192 | (oral adj6 life).tw,kw.                                                                                                                                                                                               |
| 193 | (health adj2 social determinant*).tw,kw.                                                                                                                                                                              |
| 194 | (hrqol or (quality adj3 life)).tw,kw.                                                                                                                                                                                 |
| 195 | (appraisal* adj1 health risk).tw,kw.                                                                                                                                                                                  |
| 196 | (health status adj1 (index* or indicator* or indices)).tw,kw.                                                                                                                                                         |
| 197 | (apache or (acute physiology and chronic health evaluation)).tw,kw.                                                                                                                                                   |
| 198 | (acuit* adj1 patient).tw,kw.                                                                                                                                                                                          |
| 199 | (impact profile* adj1 sickness).tw,kw.                                                                                                                                                                                |
| 200 | (cost* adj2 (disease* or illness or sickness)).tw,kw.                                                                                                                                                                 |
| 201 | (critical adj1 ill*).tw,kw.                                                                                                                                                                                           |
| 202 | comorbidity.tw,kw.                                                                                                                                                                                                    |
| 203 | multimorbidity.tw,kw.                                                                                                                                                                                                 |
| 204 | ((cohort or generation) adj1 effect*).tw,kw.                                                                                                                                                                          |
| 205 | ache*.tw,kw.                                                                                                                                                                                                          |
| 206 | (physical adj1 suffering*).tw,kw.                                                                                                                                                                                     |

|     |                                                                                                                                                                                           |
|-----|-------------------------------------------------------------------------------------------------------------------------------------------------------------------------------------------|
| 207 | physical functioning.tw,kw.                                                                                                                                                               |
| 208 | vitality.tw,kw.                                                                                                                                                                           |
| 209 | ((physical or psychic) adj health).tw,kw.                                                                                                                                                 |
| 210 | (postherpetic adj1 neuralgia).tw,kw.                                                                                                                                                      |
| 211 | (pain* adj2 (nociceptive or tissue or somatic or visceral or postoperative or post operation or procedural or referred)).tw,kw.                                                           |
| 212 | ((sensation* or limb* or pain) adj2 phantom).tw,kw.                                                                                                                                       |
| 213 | ((acute or chronic or face or facial or craniofacial or myofacial or orofacial or physical or splitting or radiating or migratory or crushing or burning or malignant) adj2 pain*).tw,kw. |
| 214 | (oral adj3 pain).tw,kw.                                                                                                                                                                   |
| 215 | chronic pain.tw,kw.                                                                                                                                                                       |
| 216 | (pain adj2 (management or measurement*)).tw,kw.                                                                                                                                           |
| 217 | (adl or self-care or worry or depression*).tw,kw.                                                                                                                                         |
| 218 | (activit* adj3 (daily living or limitation*)).tw,kw.                                                                                                                                      |
| 219 | ((care or administration* medication* or management or neglect or help or treatment*) adj1 self).tw,kw.                                                                                   |
| 220 | (selfcare or selfmanagement).tw,kw.                                                                                                                                                       |
| 221 | aging in place.tw,kw.                                                                                                                                                                     |
| 222 | (community adj1 dwelling*).tw,kw.                                                                                                                                                         |
| 223 | (independent adj1 living).tw,kw.                                                                                                                                                          |
| 224 | (participation adj1 social).tw,kw.                                                                                                                                                        |
| 225 | (depressive adj1 symptom*).tw,kw.                                                                                                                                                         |
| 226 | (diagnosis adj1 psychiatric).tw,kw.                                                                                                                                                       |
| 227 | ((effort or distress) adj1 syndrome).tw,kw.                                                                                                                                               |
| 228 | ((disorder* or obsessive) adj1 hoarding).tw,kw.                                                                                                                                           |
| 229 | ((disorder* or neuros?s) adj1 phobic).tw,kw.                                                                                                                                              |
| 230 | (mood adj (disturbance* or change)).tw,kw.                                                                                                                                                |
| 231 | (fear or frustration or happ* or hope* or helplessness or anger or pleasure or unhapp* or motivation or aspiration* or goal*).tw,kw.                                                      |
| 232 | (affective adj (illness or neuros?s or psychos?s)).tw,kw.                                                                                                                                 |



|     |                                                                                                                                                                                         |
|-----|-----------------------------------------------------------------------------------------------------------------------------------------------------------------------------------------|
| 233 | (cyclothymic adj1 personalit*).tw,kw.                                                                                                                                                   |
| 234 | (depression* adj1 (endogenous or neurotic or unipolar or postnatal or post-partum)).tw,kw.                                                                                              |
| 235 | (depressive adj1 (syndrome* or disorders)).tw,kw.                                                                                                                                       |
| 236 | ((disorder or depression) adj3 dysthymic).tw,kw.                                                                                                                                        |
| 237 | ((dental or t??th) adj1 (grinding or clenching)).tw,kw.                                                                                                                                 |
| 238 | (insufficient adj1 sleep syndrome*).tw,kw.                                                                                                                                              |
| 239 | ((health or condition or disorder*) adj2 (mental or behavio?r*)).tw,kw.                                                                                                                 |
| 240 | (mental adj (hygiene or care or factor or help or service or state or status)).tw,kw.                                                                                                   |
| 241 | (mental adj1 (disease or illness)).tw,kw.                                                                                                                                               |
| 242 | (mental adj (abnormality or change or confusion or defect or disturbance or insufficiency or symptom)).tw,kw.                                                                           |
| 243 | ((patient or personal) adj2 satisfaction).tw,kw.                                                                                                                                        |
| 244 | (patient* adj2 preference*).tw,kw.                                                                                                                                                      |
| 245 | (anxiety* or hypervigilance or nervousness or odontophobia* or uncomfortable or catastrophizing or psychasthenia).tw,kw.                                                                |
| 246 | (apnea* or apnoea or parasomnia*).tw,kw.                                                                                                                                                |
| 247 | (hypopnea* adj2 sleep).tw,kw.                                                                                                                                                           |
| 248 | (feasibility adj1 stud*).tw,kw.                                                                                                                                                         |
| 249 | smiling*.tw,kw.                                                                                                                                                                         |
| 250 | ((perception* or esteem* or confidence or concept or awareness or confrontation or image or rating or representation or actualization or disclosure or transcendence) adj1 self).tw,kw. |
| 251 | (Selfconcept or ego or Personal appearance or professional image or Superego or sense of coherence).tw,kw.                                                                              |
| 252 | ((impairment* or disorder* or disability* or disturbance) adj1 (vision or visual)).tw,kw.                                                                                               |
| 253 | (Visual adj (illusion or hallucination)).tw,kw.                                                                                                                                         |
| 254 | ((sensation or sensory or senses) adj1 (disorder* or impairment*)).tw,kw.                                                                                                               |
| 255 | (abnormal sensation or dizziness).tw,kw.                                                                                                                                                |
| 256 | (hearing adj2 (impairment* or loss or disorder*)).tw,kw.                                                                                                                                |
| 257 | hypoacus?s.tw,kw.                                                                                                                                                                       |
| 258 | ((bilateral or acquired or prelingual) adj1 deaf*).tw,kw.                                                                                                                               |

|     |                                                                                                |
|-----|------------------------------------------------------------------------------------------------|
| 259 | ((extreme or complete) adj1 hearing loss).tw,kw.                                               |
| 260 | deaf mutism.tw,kw.                                                                             |
| 261 | ((behavior?r or interaction or expression or interaction or communication) adj1 verbal).tw,kw. |
| 262 | (abilit* adj2 (speak or eat or sleep)).tw,kw.                                                  |
| 263 | ((eating or ingestion) adj2 disorder*) or ednos).tw,kw.                                        |
| 264 | (food adj1 intake).tw,kw.                                                                      |
| 265 | (drinking* or water intake).tw,kw.                                                             |
| 266 | (chewing or mastication or obesity or habit* or overweight).tw,kw.                             |
| 267 | (finger sucking or fingersucking).tw,kw.                                                       |
| 268 | (nail biting or nailbiting).tw,kw.                                                             |
| 269 | (Onychophagy or tongue habits).tw,kw.                                                          |
| 270 | (body adj3 measure*).tw,kw.                                                                    |
| 271 | ((body mass or quetelet*) adj1 index) or BMI).tw,kw.                                           |
| 272 | (body adj1 (weight* or image)).tw,kw.                                                          |
| 273 | (leanness or thinness or underweight).tw,kw.                                                   |
| 274 | (chronic adj2 (disease* or ill* or condition*)).tw,kw.                                         |
| 275 | ((medical or oral) adj4 condition*).tw,kw.                                                     |
| 276 | ((dental plaque or dmf or gingival or periodontal) adj1 (index* or indices)).tw,kw.            |
| 277 | (oral hygiene adj1 (index* or indices)).tw,kw.                                                 |
| 278 | (dentin* adj1 secondary).tw,kw.                                                                |
| 279 | (pulpitis or pulpitudes).tw,kw.                                                                |
| 280 | (inflammation* adj1 endodontic).tw,kw.                                                         |
| 281 | (t??th adj1 (endodontically treated or nonvital or devitalized or pulpless)).tw,kw.            |
| 282 | ((sensitivit* or hypersensitivit*) adj1 (dentin or dentine or t??th)).tw,kw.                   |
| 283 | ((focal adj1 infection*) or fluoros?s or overjet) adj1 dental).tw,kw.                          |
| 284 | (mottled adj1 enamel*).tw,kw.                                                                  |
| 285 | ((t??th or dentoalveolar or dental) adj2 ankylos?s).tw,kw.                                     |
| 286 | ((decay or caries or fissure*) adj2 dental).tw,kw.                                             |
| 287 | (caries adj2 stage*).tw,kw.                                                                    |
| 288 | (white adj1 spot*).tw,kw.                                                                      |

|     |                                                                                                                            |
|-----|----------------------------------------------------------------------------------------------------------------------------|
| 289 | (dental adj3 spot*).tw,kw.                                                                                                 |
| 290 | (cariou adj2 dentin*).tw,kw.                                                                                               |
| 291 | ((cary or caries) adj2 (cervical or root)).tw,kw.                                                                          |
| 292 | (odontalgia* or toothache* or tooth pain).tw,kw.                                                                           |
| 293 | (disease* adj2 non communicable).tw,kw.                                                                                    |
| 294 | non infectious disease*.tw,kw.                                                                                             |
| 295 | (dental adj1 plaque).tw,kw.                                                                                                |
| 296 | sepsis.tw,kw.                                                                                                              |
| 297 | ((periodontal or periapical) adj1 disease*).tw,kw.                                                                         |
| 298 | (disease* adj1 gingival).tw,kw.                                                                                            |
| 299 | (periodontiti* or periodontos?s or pericementitis or gingiviti* or fusospirillos?s or pericoroniti*).tw,kw.                |
| 300 | (pocket* adj1 gingival).tw,kw.                                                                                             |
| 301 | (gingiv* adj2 (atroph* or recession*)).tw,kw.                                                                              |
| 302 | ((alveolar or periodont*) adj2 (bone loss* or atroph* or resorption)).tw,kw.                                               |
| 303 | (periodontal attachment adj1 loss).tw,kw.                                                                                  |
| 304 | ((periodontal or gingival) adj1 (abscess* or pocket*)).tw,kw.                                                              |
| 305 | suffering*.tw,kw.                                                                                                          |
| 306 | ((psychologic* or life or emotional or disorder* or management or mental or psychic or psycho social) adj1 stress*).tw,kw. |
| 307 | (emotional adj (factor or response or status or structure)).tw,kw.                                                         |
| 308 | emotion*.tw,kw.                                                                                                            |
| 309 | ((Mental or psychic) adj1 Tension).tw,kw.                                                                                  |
| 310 | schizotypal personality.tw,kw.                                                                                             |
| 311 | (personality adj1 (characteristic or pattern or structure or type)).tw,kw.                                                 |
| 312 | (burn out or burnout).tw,kw.                                                                                               |
| 313 | ((work place or workplace or work or job or occupational or professional) adj2 stress*).tw,kw.                             |
| 314 | (saliva* or spittle).tw,kw.                                                                                                |
| 315 | (blood adj1 poisoning*).tw,kw.                                                                                             |
| 316 | (seps?s or septicemia* or bacteremia* or fungemia*).tw,kw.                                                                 |

|     |                                                                                                                                                                                                                                                                                                                                                                                                                                                                  |
|-----|------------------------------------------------------------------------------------------------------------------------------------------------------------------------------------------------------------------------------------------------------------------------------------------------------------------------------------------------------------------------------------------------------------------------------------------------------------------|
| 317 | ((endotoxic or septic or toxic) adj1 shock).tw,kw.                                                                                                                                                                                                                                                                                                                                                                                                               |
| 318 | ((right or respect or sanctit* or value) adj2 life).tw,kw.                                                                                                                                                                                                                                                                                                                                                                                                       |
| 319 | (shy* or timid* or assertiveness).tw,kw.                                                                                                                                                                                                                                                                                                                                                                                                                         |
| 320 | (family adj1 planning).tw,kw.                                                                                                                                                                                                                                                                                                                                                                                                                                    |
| 321 | (family adj1 allowance*).tw,kw.                                                                                                                                                                                                                                                                                                                                                                                                                                  |
| 322 | (family adj2 health).tw,kw.                                                                                                                                                                                                                                                                                                                                                                                                                                      |
| 323 | (family adj5 life).tw,kw.                                                                                                                                                                                                                                                                                                                                                                                                                                        |
| 324 | (family adj3 well*).tw,kw.                                                                                                                                                                                                                                                                                                                                                                                                                                       |
| 325 | (family adj1 (dynamic* or relation* or interaction* or outcome* or histor*)).tw,kw.                                                                                                                                                                                                                                                                                                                                                                              |
| 326 | ((family or interparental or marital) adj1 conflict*).tw,kw.                                                                                                                                                                                                                                                                                                                                                                                                     |
| 327 | (family adj2 relation*).tw,kw.                                                                                                                                                                                                                                                                                                                                                                                                                                   |
| 328 | or/127-327                                                                                                                                                                                                                                                                                                                                                                                                                                                       |
| 329 | 126 and 328                                                                                                                                                                                                                                                                                                                                                                                                                                                      |
| 330 | limit 329 to animals                                                                                                                                                                                                                                                                                                                                                                                                                                             |
| 331 | 329 not 330                                                                                                                                                                                                                                                                                                                                                                                                                                                      |
| 332 | limit 331 to (english language and yr="1999 -Current" and (article or article in press))                                                                                                                                                                                                                                                                                                                                                                         |
| 333 | limit 332 to (evidence based medicine or consensus development or meta analysis or outcomes research or "systematic review" or "qualitative (best balance of sensitivity and specificity)")                                                                                                                                                                                                                                                                      |
| 334 | Clinical study/ or Case control study/ or Family study/ or Longitudinal study/ or Retrospective study/ or (Prospective study/ not Randomized controlled trials/) or Cohort analysis/ or (Cohort adj (study or studies)).mp. or (Case control adj (study or studies)).tw. or (follow up adj (study or studies)).tw. or (observational adj (study or studies)).tw. or (epidemiologic\$ adj (study or studies)).tw. or (cross sectional adj (study or studies)).tw. |
| 335 | 332 and 334                                                                                                                                                                                                                                                                                                                                                                                                                                                      |
| 336 | 333 or 335                                                                                                                                                                                                                                                                                                                                                                                                                                                       |
| 337 | (Equipment* or device* or supply or supplies or t??th brush* or t??thbrush or tooth paste or toothpaste or versus).ti.                                                                                                                                                                                                                                                                                                                                           |
| 338 | (rats or rat or mice or dog* or pig* or horse* or dog* or mouse or rabbit* or animal*).tw,kw.                                                                                                                                                                                                                                                                                                                                                                    |
| 339 | (dental adj2 (student* or school* or university or universities or college*)).tw,kw.                                                                                                                                                                                                                                                                                                                                                                             |
| 340 | 337 or 338 or 339                                                                                                                                                                                                                                                                                                                                                                                                                                                |
| 341 | 336 not 340                                                                                                                                                                                                                                                                                                                                                                                                                                                      |

**Key**

/ = indexing term (Emtree heading)

exp = exploded indexing term (Emtree heading)

\$ = truncation

tw = text word search in title or abstract fields

kw = terms in author provided keyword exact

pt = publication type.

adjn = terms within (n-1) words of each other (any order)

**3. CINAHL:**

**Language:** English

**Age group:** No limitation

**Publication year:** after 1999

**Publication Types:** Evidence-Based Care Sheet, Meta-analysis, Meta Synthesis, Systematic Reviews

**Clinical Queries:** Review (best balance of sensitivity and specificity), Qualitative: (best balance of sensitivity and specificity)

**External filters used:** qualitative studies, cohort studies, case control studies

**Exclusion:** equipment and supplies, all animal studies

Searched on November 19, 2021

**Records retrieved:** 7923

**Interface - EBSCOhost Research Databases**

**Database - CINAHL Plus with Full Text**

Search history sorted by search number descending.

|      |                                                                                                                                                                                                                                                                                  |                                                                                                                 |
|------|----------------------------------------------------------------------------------------------------------------------------------------------------------------------------------------------------------------------------------------------------------------------------------|-----------------------------------------------------------------------------------------------------------------|
| S287 | S282 NOT S286                                                                                                                                                                                                                                                                    | Search modes – Boolean/Phrase                                                                                   |
| S286 | S283 OR S284 OR S285                                                                                                                                                                                                                                                             | Search modes - Boolean/Phrase                                                                                   |
| S285 | TI ( dental NO (student* or school* or university or universities or college*) ) OR AB ( dental NO (student* or school* or university or universities or college*) )                                                                                                             | Search modes - Boolean/Phrase                                                                                   |
| S284 | TI ( Equipment* or instrument* or device* or supply or supplies or t??th brush* or t??thbrush or tooth paste or toothpaste or versus ) OR AB ( Equipment* or instrument* or device* or supply or supplies or t??th brush* or t??thbrush or tooth paste or toothpaste or versus ) | Search modes - Boolean/Phrase                                                                                   |
| S283 | TI ( rats or rat or mice or dog* or pig or horse* or mouse or rabbit or animal* ) OR AB ( rats or rat or mice or dog* or pig or horse* or mouse or rabbit or animal*) )                                                                                                          | Search modes - Boolean/Phrase                                                                                   |
| S282 | S275 OR S280 OR S281                                                                                                                                                                                                                                                             | Search modes - Boolean/Phrase                                                                                   |
| S281 | S274                                                                                                                                                                                                                                                                             | Limiters - Clinical Queries: Review - Best Balance, Qualitative - Best Balance<br>Search modes - Boolean/Phrase |
| S280 | S274 AND S279                                                                                                                                                                                                                                                                    | Search modes - Boolean/Phrase                                                                                   |
| S279 | S276 OR S277 OR S278                                                                                                                                                                                                                                                             | Search modes - Boolean/Phrase                                                                                   |
| S278 | (TI (interview)) OR (AB (interview)) OR (MH "Audiorecording") OR (TI ("qualitative stud*")) OR (AB ("qualitative stud*"))                                                                                                                                                        | Search modes - Boolean/Phrase                                                                                   |

|      |                                                                                                                                                                                                                                                                                                                                                                                                                                                                                                                                                                                                              |                                                                                                                                           |
|------|--------------------------------------------------------------------------------------------------------------------------------------------------------------------------------------------------------------------------------------------------------------------------------------------------------------------------------------------------------------------------------------------------------------------------------------------------------------------------------------------------------------------------------------------------------------------------------------------------------------|-------------------------------------------------------------------------------------------------------------------------------------------|
| S277 | (TI (cohort)) OR (AB (cohort)) OR (MH "Cohort Studies") OR (TI (longitudinal)) OR (AB (longitudinal)) OR (TI (prospective)) OR (AB (prospective)) OR (TI (retrospective)) OR (AB (retrospective))                                                                                                                                                                                                                                                                                                                                                                                                            | Search modes - Boolean/Phrase                                                                                                             |
| S276 | (MH "Case Control Studies+") or (MH "Control Group") or (MH "Matched-Pair Analysis") or (TI (case or cases) n5 TI (control or controls)) OR (AB (case or cases) n5 AB (control or controls)) OR (TI (case or cases) n3 TI (matched)) OR (AB (case or cases) n3 AB (matched)) OR TI (control group*)                                                                                                                                                                                                                                                                                                          | Search modes - Boolean/Phrase                                                                                                             |
| S275 | S274                                                                                                                                                                                                                                                                                                                                                                                                                                                                                                                                                                                                         | Limiters - Publication Type: Evidence-Based Care Sheet, Meta Analysis, Meta Synthesis, Systematic Review<br>Search modes - Boolean/Phrase |
| S274 | S273                                                                                                                                                                                                                                                                                                                                                                                                                                                                                                                                                                                                         | Limiters - Published Date: 19990101-20190831; English Language<br>Search modes - Boolean/Phrase                                           |
| S273 | S137 AND S272                                                                                                                                                                                                                                                                                                                                                                                                                                                                                                                                                                                                | Search modes - Boolean/Phrase                                                                                                             |
| S272 | S138 OR S139 OR S140 OR S141 OR S142 OR S143 OR S144 OR S145 OR S146 OR S147 OR S148 OR S149 OR S150 OR S151 OR S152 OR S153 OR S154 OR S155 OR S156 OR S157 OR S158 OR S159 OR S160 OR S161 OR S162 OR S163 OR S164 OR S165 OR S166 OR S167 OR S168 OR S169 OR S170 OR S171 OR S172 OR S173 OR S174 OR S175 OR S176 OR S177 OR S178 OR S179 OR S180 OR S181 OR S182 OR S183 OR S184 OR S185 OR S186 OR S187 OR S188 OR S189 OR S190 OR S191 OR S192 OR S193 OR S194 OR S195 OR S196 OR S197 OR S198 OR S199 OR S200 OR S201 OR S202 OR S203 OR S204 OR S205 OR S206 OR S207 OR S208 OR S209 OR S210 OR S211 | Search modes - Boolean/Phrase                                                                                                             |

|      |                                                                                                                                                                                                                                                                                                                                                                                                                                                                                                 |                               |
|------|-------------------------------------------------------------------------------------------------------------------------------------------------------------------------------------------------------------------------------------------------------------------------------------------------------------------------------------------------------------------------------------------------------------------------------------------------------------------------------------------------|-------------------------------|
|      | OR S212 OR S213 OR S214 OR S215 OR S216 OR S217 OR S218 OR S219 OR S220 OR S221 OR S222 OR S223 OR S224 OR S225 OR S226 OR S227 OR S228 OR S229 OR S230 OR S231 OR S232 OR S233 OR S234 OR S235 OR S236 OR S237 OR S238 OR S239 OR S240 OR S241 OR S242 OR S243 OR S244 OR S245 OR S246 OR S247 OR S248 OR S249 OR S250 OR S251 OR S252 OR S253 OR S254 OR S255 OR S256 OR S257 OR S258 OR S259 OR S260 OR S261 OR S262 OR S263 OR S264 OR S265 OR S266 OR S267 OR S268 OR S269 OR S270 OR S271 |                               |
| S271 | TI health NO status OR AB health NO status                                                                                                                                                                                                                                                                                                                                                                                                                                                      | Search modes - Boolean/Phrase |
| S270 | (MH "Health Status") OR (MH "Health Status Disparities")                                                                                                                                                                                                                                                                                                                                                                                                                                        | Search modes - Boolean/Phrase |
| S269 | TI ( absenteeism or presenteeism ) OR AB ( absenteeism or presenteeism )                                                                                                                                                                                                                                                                                                                                                                                                                        | Search modes - Boolean/Phrase |
| S268 | (MH "Absenteeism") OR (MH "Presenteeism")                                                                                                                                                                                                                                                                                                                                                                                                                                                       | Search modes - Boolean/Phrase |
| S267 | TI ( expenditure* or expense* ) OR AB ( expenditure* or expense* )                                                                                                                                                                                                                                                                                                                                                                                                                              | Search modes - Boolean/Phrase |
| S266 | TI ( “out of pocket” NO (cost* or pay* or spending) ) OR AB ( “out of pocket” NO (cost* or pay* or spending) )                                                                                                                                                                                                                                                                                                                                                                                  | Search modes - Boolean/Phrase |
| S265 | TI ( cost* NO (effectiveness or comparison* or measure* or allocation* or apportionment* or shifting* or containment* or control* or sharing or saving*) ) OR AB ( cost* NO (effectiveness or comparison* or measure* or allocation* or apportionment* or shifting* or containment* or control* or sharing or saving*) )                                                                                                                                                                        | Search modes - Boolean/Phrase |
| S264 | TI ( cost* N1 (analys?s or benefit*) ) OR AB ( cost* N1 (analys?s or benefit*) )                                                                                                                                                                                                                                                                                                                                                                                                                | Search modes - Boolean/Phrase |
| S263 | TI marginal NO analys?s OR AB marginal NO analys?s                                                                                                                                                                                                                                                                                                                                                                                                                                              | Search modes - Boolean/Phrase |
| S262 | TI expropriation* OR AB expropriation*                                                                                                                                                                                                                                                                                                                                                                                                                                                          | Search modes - Boolean/Phrase |
| S261 | TI ( (healthcare or “health care”) NO ration* ) OR AB ( (healthcare or “health care”) NO ration* )                                                                                                                                                                                                                                                                                                                                                                                              | Search modes - Boolean/Phrase |



|      |                                                                                                                                                                        |                               |
|------|------------------------------------------------------------------------------------------------------------------------------------------------------------------------|-------------------------------|
| S260 | TI allocative N0 efficiency OR AB allocative N0 efficiency                                                                                                             | Search modes - Boolean/Phrase |
| S259 | TI resource N1 allocation* OR AB resource N1 allocation*                                                                                                               | Search modes - Boolean/Phrase |
| S258 | TI compensation* OR AB compensation*                                                                                                                                   | Search modes - Boolean/Phrase |
| S257 | TI utility N0 theor* OR AB utility N0 theor*                                                                                                                           | Search modes - Boolean/Phrase |
| S256 | TI productivity OR AB productivity                                                                                                                                     | Search modes - Boolean/Phrase |
| S255 | TI “household consumption*” OR AB “household consumption*”                                                                                                             | Search modes - Boolean/Phrase |
| S254 | TI easterlin N0 hypothesis OR AB easterlin N0 hypothesis                                                                                                               | Search modes - Boolean/Phrase |
| S253 | TI cost* N1 living OR AB cost* N1 living                                                                                                                               | Search modes - Boolean/Phrase |
| S252 | TI Consumption OR AB Consumption                                                                                                                                       | Search modes - Boolean/Phrase |
| S251 | TI ( “consumer price” N0 (index* or indices) ) OR AB ( “consumer price” N0 (index* or indices) )                                                                       | Search modes - Boolean/Phrase |
| S250 | TI literac* OR AB literac*                                                                                                                                             | Search modes - Boolean/Phrase |
| S249 | TI educational N1 status* OR AB educational N1 status*                                                                                                                 | Search modes - Boolean/Phrase |
| S248 | TI ( (high* or middle or low* or develop*) N1 countr* ) OR AB ( (high* or middle or low* or develop*) N1 countr* )                                                     | Search modes - Boolean/Phrase |
| S247 | TI ( income N1 (group* or level* or classification* or high* or middle or low*) ) OR AB ( income N1 (group* or level* or classification* or high* or middle or low*) ) | Search modes - Boolean/Phrase |
| S246 | TI ( (macroeconomic or microeconomic or socioeconomic) N0 (factor* or aspect*) ) OR AB ( (macroeconomic or microeconomic or socioeconomic) N0 (factor* or aspect*) )   | Search modes - Boolean/Phrase |

|      |                                                                                                |                                  |
|------|------------------------------------------------------------------------------------------------|----------------------------------|
| S245 | TI economic* OR AB economic*                                                                   | Search modes -<br>Boolean/Phrase |
| S244 | TI ( (hospital or patient) NO readmission* ) OR AB ( (hospital or patient) NO readmission* )   | Search modes -<br>Boolean/Phrase |
| S243 | TI ( (patient or voluntary) NO admission* ) OR AB ( (patient or voluntary) NO admission* )     | Search modes -<br>Boolean/Phrase |
| S242 | TI length* N1 stay* OR AB length* N1 stay*                                                     | Search modes -<br>Boolean/Phrase |
| S241 | TI hospital stay* OR AB hospital stay*                                                         | Search modes -<br>Boolean/Phrase |
| S240 | TI hospital N1 service* OR AB hospital N1 service*                                             | Search modes -<br>Boolean/Phrase |
| S239 | TI hospitali?ation* OR AB hospitali?ation*                                                     | Search modes -<br>Boolean/Phrase |
| S238 | TI health N1 manpower OR AB health N1 manpower                                                 | Search modes -<br>Boolean/Phrase |
| S237 | TI ( health NO (resource* or workforce) ) OR AB ( health NO (resource* or workforce) )         | Search modes -<br>Boolean/Phrase |
| S236 | TI ( (back or return) N1 work ) OR AB ( (back or return) N1 work )                             | Search modes -<br>Boolean/Phrase |
| S235 | TI career NO mobilit* OR AB (career NO mobilit*                                                | Search modes -<br>Boolean/Phrase |
| S234 | TI ( (career or clinical or job) NO ladder* ) OR AB ( (career or clinical or job) NO ladder* ) | Search modes -<br>Boolean/Phrase |
| S233 | TI underemployment OR AB underemployment                                                       | Search modes -<br>Boolean/Phrase |
| S232 | TI occupational N1 status OR AU occupational N1 status                                         | Search modes -<br>Boolean/Phrase |
| S231 | TI labo#r force OR AB labo#r force                                                             | Search modes -<br>Boolean/Phrase |

|      |                                                                                                                                                                                    |                               |
|------|------------------------------------------------------------------------------------------------------------------------------------------------------------------------------------|-------------------------------|
| S230 | TI employment OR AB employment                                                                                                                                                     | Search modes - Boolean/Phrase |
| S229 | TI ( (work or job or vocation* or life) N2 (satisfaction* or performance* or stress*) ) OR AB ( (work or job or vocation* or life) N2 (satisfaction* or performance* or stress*) ) | Search modes - Boolean/Phrase |
| S228 | TI “Uncompensated care” OR AB “Uncompensated care”                                                                                                                                 | Search modes - Boolean/Phrase |
| S227 | TI ( (senior or aged or elderly) N2 (centre* or center* or home* or facilit*) ) OR AB ( (senior or aged or elderly) N2 (centre* or center* or home* or facilit*) )                 | Search modes - Boolean/Phrase |
| S226 | TI ( (“displaced person*” or refugee) N0 (camp* or settlement* or shelter*) ) OR AB ( (“displaced person*” or refugee) N0 (camp* or settlement* or shelter*) )                     | Search modes - Boolean/Phrase |
| S225 | TI ( (emergency or evacuation) N0 shelter* ) OR AB ( (emergency or evacuation) N0 shelter* )                                                                                       | Search modes - Boolean/Phrase |
| S224 | TI ( (employment or occupational or employee*) N2 (health or assistance) ) OR AB ( (employment or occupational or employee*) N2 (health or assistance) )                           | Search modes - Boolean/Phrase |
| S223 | TI Maternal N0 health N0 service* OR AB Maternal N0 health N0 service*                                                                                                             | Search modes - Boolean/Phrase |
| S222 | TI Hospice* OR AB Hospice*                                                                                                                                                         | Search modes - Boolean/Phrase |
| S221 | TI ( (home or domiciliary) N0 care ) OR AB ( (home or domiciliary) N0 care )                                                                                                       | Search modes - Boolean/Phrase |
| S220 | TI ( (foster or kinship) N1 care ) OR AB ( (foster or kinship) N1 care )                                                                                                           | Search modes - Boolean/Phrase |
| S219 | TI ( planned N0 (pregnanc* or parenthood) ) OR AB ( planned N0 (pregnanc* or parenthood) )                                                                                         | Search modes - Boolean/Phrase |
| S218 | TI family N0 planning OR AB family N0 planning                                                                                                                                     | Search modes - Boolean/Phrase |
| S217 | TI community N0 pharmac* N0 service* OR AB community N0 pharmac* N0 service*                                                                                                       | Search modes - Boolean/Phrase |
| S216 | TI community N0 network* OR AB community N0 network*                                                                                                                               | Search modes - Boolean/Phrase |

|      |                                                                                                                                                                                                                        |                               |
|------|------------------------------------------------------------------------------------------------------------------------------------------------------------------------------------------------------------------------|-------------------------------|
| S215 | TI assertive N0 community N0 treatment* OR AB assertive N0 community N0 treatment*                                                                                                                                     | Search modes - Boolean/Phrase |
| S214 | TI ( ("public health" or community) N1 nursing ) OR AB ( ("public health" or community) N1 nursing )                                                                                                                   | Search modes - Boolean/Phrase |
| S213 | TI ( daycare N0 (center* or centre*) ) OR AB ( daycare N0 (center* or centre*) )                                                                                                                                       | Search modes - Boolean/Phrase |
| S212 | TI ( community N0 (integration* or reintegration* or program*) ) OR AB ( community N0 (integration* or reintegration* or program*) )                                                                                   | Search modes - Boolean/Phrase |
| S211 | TI ( community N1 (health or care) ) OR AB ( community N1 (health or care) )                                                                                                                                           | Search modes - Boolean/Phrase |
| S210 | TI ( functional N0 (assessment* or training*) ) OR AB ( functional N0 (assessment* or training*) )                                                                                                                     | Search modes - Boolean/Phrase |
| S209 | TI ( rehabilitation* or readaptation* or readjustment* or recover* or resociali?ation* or revalidation* ) OR AB ( rehabilitation* or readaptation* or readjustment* or recover* or resociali?ation* or revalidation* ) | Search modes - Boolean/Phrase |
| S208 | TI medical N1 overus* OR AB medical N1 overus*                                                                                                                                                                         | Search modes - Boolean/Phrase |
| S207 | TI ( (preventative or physician* or diagnostic) N1 service* ) OR AB ( (preventative or physician* or diagnostic) N1 service* )                                                                                         | Search modes - Boolean/Phrase |
| S206 | TI ( health N1 (service* or agenc* or practice*) ) OR AB ( health N1 (service* or agenc* or practice*) )                                                                                                               | Search modes - Boolean/Phrase |
| S205 | TI health N2 system* OR AB health N2 system*                                                                                                                                                                           | Search modes - Boolean/Phrase |
| S204 | TI ( (drug or medicine) N1 (us* or misus* or consumption*) ) OR AB ( (drug or medicine) N1 (us* or misus* or consumption*) )                                                                                           | Search modes - Boolean/Phrase |
| S203 | TI drug N2 utilization OR AB drug N2 utilization                                                                                                                                                                       | Search modes - Boolean/Phrase |
| S202 | TI responsiveness OR AB responsiveness                                                                                                                                                                                 | Search modes - Boolean/Phrase |
| S201 | TI time N3 loss OR AB time N3 loss                                                                                                                                                                                     | Search modes - Boolean/Phrase |

|      |                                                                                                                                                                                    |                               |
|------|------------------------------------------------------------------------------------------------------------------------------------------------------------------------------------|-------------------------------|
| S200 | TI health N2 indicator* N2 indicator* OR AB health N2 indicator*                                                                                                                   | Search modes - Boolean/Phrase |
| S199 | TI organizational N0 involvement* OR AB organizational N0 involvement*                                                                                                             | Search modes - Boolean/Phrase |
| S198 | TI triage* OR AB triage*                                                                                                                                                           | Search modes - Boolean/Phrase |
| S197 | TI patient* N1 transport* OR AB patient* N1 transport*                                                                                                                             | Search modes - Boolean/Phrase |
| S196 | TI emergency N0 psychiatric N1 service* OR AB emergency N0 psychiatric N1 service*                                                                                                 | Search modes - Boolean/Phrase |
| S195 | TI ( emergency N2 (visit* or admission*) ) OR AB ( emergency N2 (visit* or admission*) )                                                                                           | Search modes - Boolean/Phrase |
| S194 | TI emergency N1 unit OR AB emergency N1 unit                                                                                                                                       | Search modes - Boolean/Phrase |
| S193 | TI ( trauma N0 (center* or centre*) ) OR AB ( trauma N0 (center* or centre*) )                                                                                                     | Search modes - Boolean/Phrase |
| S192 | TI ( emergency N0 (ward* or department* or room* or centre* or center* or dispensar*) ) OR AB ( emergency N0 (ward* or department* or room* or centre* or center* or dispensar*) ) | Search modes - Boolean/Phrase |
| S191 | TI emergency N0 hospital N0 service* OR AB emergency N0 hospital N0 service*                                                                                                       | Search modes - Boolean/Phrase |
| S190 | TI emergency N1 dispatch* OR AB emergency N1 dispatch*                                                                                                                             | Search modes - Boolean/Phrase |
| S189 | TI “advanced trauma life support” OR AB “advanced trauma life support”                                                                                                             | Search modes - Boolean/Phrase |
| S188 | TI emergicenter* OR AB emergicenter*                                                                                                                                               | Search modes - Boolean/Phrase |
| S187 | TI emergency N1 care OR AB emergency N1 care                                                                                                                                       | Search modes - Boolean/Phrase |
| S186 | TI ( (accident* or emergenc*) N1 service* ) OR AB ( (accident* or emergenc*) N1 service* )                                                                                         | Search modes - Boolean/Phrase |

|      |                                                                                                                              |                               |
|------|------------------------------------------------------------------------------------------------------------------------------|-------------------------------|
| S185 | TI productivity OR AB productivity                                                                                           | Search modes - Boolean/Phrase |
| S184 | TI efficiency OR AB efficiency                                                                                               | Search modes - Boolean/Phrase |
| S183 | TI ( sport* or athletic* ) OR AB ( sport* or athletic* )                                                                     | Search modes - Boolean/Phrase |
| S182 | TI ( hobby or hobbies ) OR AB ( hobby or hobbies )                                                                           | Search modes - Boolean/Phrase |
| S181 | TI relaxation* OR AB relaxation*                                                                                             | Search modes - Boolean/Phrase |
| S180 | TI recreation* OR AB recreation*                                                                                             | Search modes - Boolean/Phrase |
| S179 | TI ( festival* or holiday* ) OR AB ( festival* or holiday* )                                                                 | Search modes - Boolean/Phrase |
| S178 | TI leisure* OR AB leisure*                                                                                                   | Search modes - Boolean/Phrase |
| S177 | TI ( (psychological or psychosocial or social) N0 support* ) OR AB ( (psychological or psychosocial or social) N0 support* ) | Search modes - Boolean/Phrase |
| S176 | TI family N0 allowance* OR AB family N0 allowance*                                                                           | Search modes - Boolean/Phrase |
| S175 | TI aid N2 “families with dependent children” OR AB aid N2 “families with dependent children”                                 | Search modes - Boolean/Phrase |
| S174 | TI ( social N0 (security or insurance) ) OR AB ( social N0 (security or insurance) )                                         | Search modes - Boolean/Phrase |
| S173 | TI “social welfare” OR AB “social welfare”                                                                                   | Search modes - Boolean/Phrase |
| S172 | TI federal N1 aid* OR AB federal N1 aid*                                                                                     | Search modes - Boolean/Phrase |
| S171 | TI investment* OR AB investment*                                                                                             | Search modes - Boolean/Phrase |

|      |                                                                                                                                                      |                               |
|------|------------------------------------------------------------------------------------------------------------------------------------------------------|-------------------------------|
| S170 | TI ( (healthcare or “health care”) N0 (industr* or market* or sector*) ) OR AB ( (healthcare or “health care”) N0 (industr* or market* or sector*) ) | Search modes - Boolean/Phrase |
| S169 | TI health N1 marketing OR AB health N1 marketing                                                                                                     | Search modes - Boolean/Phrase |
| S168 | TI ( (group or shared or joint) N0 purchasing ) OR AB ( (group or shared or joint) N0 purchasing )                                                   | Search modes - Boolean/Phrase |
| S167 | TI "direct service" N0 cost* OR AB "direct service" N0 cost*                                                                                         | Search modes - Boolean/Phrase |
| S166 | TI ( charge* or fee or fees ) OR AB ( charge* or fee or fees )                                                                                       | Search modes - Boolean/Phrase |
| S165 | TI debt* OR AB debt*                                                                                                                                 | Search modes - Boolean/Phrase |
| S164 | TI ( medical or health* or treatment or drug or hospital) N1 cost* ) OR AB ( medical or health* or treatment or drug or hospital) N1 cost* )         | Search modes - Boolean/Phrase |
| S163 | TI pricing OR AB pricing                                                                                                                             | Search modes - Boolean/Phrase |
| S162 | TI affordabilit* OR AB affordabilit*                                                                                                                 | Search modes - Boolean/Phrase |
| S161 | TI "return on investment" OR AB "return on investment" OR TI ROI OR AB ROI                                                                           | Search modes - Boolean/Phrase |
| S160 | (MH "Productivity")                                                                                                                                  | Search modes - Boolean/Phrase |
| S159 | (MH "Leisure Activities+")                                                                                                                           | Search modes - Boolean/Phrase |
| S158 | (MH "Support, Psychosocial")                                                                                                                         | Search modes - Boolean/Phrase |
| S157 | (MH "Economics+")                                                                                                                                    | Search modes - Boolean/Phrase |
| S156 | (MH "Work Environment")                                                                                                                              | Search modes - Boolean/Phrase |

|      |                                                                                                                                                          |                                  |
|------|----------------------------------------------------------------------------------------------------------------------------------------------------------|----------------------------------|
| S155 | (MH "Downsizing, Organizational")                                                                                                                        | Search modes -<br>Boolean/Phrase |
| S154 | (MH "Job Re-Entry")                                                                                                                                      | Search modes -<br>Boolean/Phrase |
| S153 | (MH "Career Mobility+")                                                                                                                                  | Search modes -<br>Boolean/Phrase |
| S152 | (MH "Employment+") OR (MH "Unemployment")                                                                                                                | Search modes -<br>Boolean/Phrase |
| S151 | (MH "Job Satisfaction")                                                                                                                                  | Search modes -<br>Boolean/Phrase |
| S150 | (MH "Role") OR (MH "Professional Role") OR (MH "Nursing Role") OR (MH "Physician's Role") OR (MH "Sick Role")                                            | Search modes -<br>Boolean/Phrase |
| S149 | (MH "Self Care") OR (MH "Self Care Agency") OR (MH "Self-Management")                                                                                    | Search modes -<br>Boolean/Phrase |
| S148 | (MH "Activities of Daily Living") OR (MH "Social Participation")                                                                                         | Search modes -<br>Boolean/Phrase |
| S147 | (MH "Rehabilitation")                                                                                                                                    | Search modes -<br>Boolean/Phrase |
| S146 | (MH "Poison Control Centers")                                                                                                                            | Search modes -<br>Boolean/Phrase |
| S145 | (MH "Advanced Trauma Life Support Care")                                                                                                                 | Search modes -<br>Boolean/Phrase |
| S144 | (MH "Emergency Medical Services+")                                                                                                                       | Search modes -<br>Boolean/Phrase |
| S143 | (MH "Hospitalization+") OR (MH "Length of Stay") OR (MH "Patient Admission") OR (MH "Patient Discharge") OR (MH "Patient Dumping") OR (MH "Readmission") | Search modes -<br>Boolean/Phrase |
| S142 | (MH "Hospices")                                                                                                                                          | Search modes -<br>Boolean/Phrase |
| S141 | (MH "Child Health Services+")                                                                                                                            | Search modes -<br>Boolean/Phrase |



|      |                                                                                                                                                    |                                                                                    |
|------|----------------------------------------------------------------------------------------------------------------------------------------------------|------------------------------------------------------------------------------------|
| S140 | (MH "Community Health Services+")                                                                                                                  | Search modes -<br>Boolean/Phrase                                                   |
| S139 | (MH "Health Services")                                                                                                                             | Search modes -<br>Boolean/Phrase                                                   |
| S138 | (MH "Drug Utilization+") OR (MH "Utilization Review")                                                                                              | Search modes -<br>Boolean/Phrase                                                   |
| S137 | S26 OR S136                                                                                                                                        | Search modes -<br>Boolean/Phrase                                                   |
| S136 | S125 OR S135                                                                                                                                       | Search modes -<br>Boolean/Phrase                                                   |
| S135 | S133 OR S134                                                                                                                                       | Search modes -<br>Boolean/Phrase                                                   |
| S134 | S131                                                                                                                                               | Limiters - Special<br>Interest: Dental<br>Care<br>Search modes -<br>Boolean/Phrase |
| S133 | S131 AND S132                                                                                                                                      | Search modes -<br>Boolean/Phrase                                                   |
| S132 | (MH "Dentistry")                                                                                                                                   | Search modes -<br>Boolean/Phrase                                                   |
| S131 | S126 OR S127 OR S128 OR S129 OR S130                                                                                                               | Search modes -<br>Boolean/Phrase                                                   |
| S130 | TI ( (public or deliver* or system*) N0 ("health care" or healthcare) ) OR AB ( (public or deliver* or system*) N0 ("health care" or healthcare) ) | Search modes -<br>Boolean/Phrase                                                   |
| S129 | TI ( Pathology or pathological or telepathology ) OR AB ( Pathology or pathological or telepathology )                                             | Search modes -<br>Boolean/Phrase                                                   |
| S128 | TI "head start" N0 program* OR AB "head start" N0 program*                                                                                         | Search modes -<br>Boolean/Phrase                                                   |
| S127 | TI program* N1 wellness OR AB program* N1 wellness                                                                                                 | Search modes -<br>Boolean/Phrase                                                   |

|      |                                                                                                                                                                                                                                                                                                                                                                                                                                                                                                                                                                                                                                                                                                                                     |                               |
|------|-------------------------------------------------------------------------------------------------------------------------------------------------------------------------------------------------------------------------------------------------------------------------------------------------------------------------------------------------------------------------------------------------------------------------------------------------------------------------------------------------------------------------------------------------------------------------------------------------------------------------------------------------------------------------------------------------------------------------------------|-------------------------------|
| S126 | TI ( (promotion* or campaign* or program*) N1 health ) OR AB ( (promotion* or campaign* or program*) N1 health )                                                                                                                                                                                                                                                                                                                                                                                                                                                                                                                                                                                                                    | Search modes - Boolean/Phrase |
| S125 | S27 OR S28 OR S29 OR S30 OR S31 OR S32 OR S33 OR S34 OR S35 OR S36 OR S37 OR S38 OR S39 OR S40 OR S41 OR S42 OR S43 OR S44 OR S45 OR S46 OR S47 OR S48 OR S49 OR S50 OR S51 OR S52 OR S53 OR S54 OR S55 OR S56 OR S57 OR S58 OR S59 OR S60 OR S61 OR S62 OR S63 OR S64 OR S65 OR S66 OR S67 OR S68 OR S69 OR S70 OR S71 OR S72 OR S73 OR S74 OR S75 OR S76 OR S77 OR S78 OR S79 OR S80 OR S81 OR S82 OR S83 OR S84 OR S85 OR S86 OR S87 OR S88 OR S89 OR S90 OR S91 OR S92 OR S93 OR S94 OR S95 OR S96 OR S97 OR S98 OR S99 OR S100 OR S101 OR S102 OR S103 OR S104 OR S105 OR S106 OR S107 OR S108 OR S109 OR S110 OR S111 OR S112 OR S113 OR S114 OR S115 OR S116 OR S117 OR S118 OR S119 OR S120 OR S121 OR S122 OR S123 OR S124 | Search modes - Boolean/Phrase |
| S124 | TI medicine N0 oral OR AB medicine N0 oral                                                                                                                                                                                                                                                                                                                                                                                                                                                                                                                                                                                                                                                                                          | Search modes - Boolean/Phrase |
| S123 | TI stomatolog* OR AB stomatolog*                                                                                                                                                                                                                                                                                                                                                                                                                                                                                                                                                                                                                                                                                                    | Search modes - Boolean/Phrase |
| S122 | TI ( mouth N0 protect*) OR AB ( mouth N0 protect* )                                                                                                                                                                                                                                                                                                                                                                                                                                                                                                                                                                                                                                                                                 | Search modes - Boolean/Phrase |
| S121 | TI ( mouth N0 guard ) OR AB ( mouth N0 guard )                                                                                                                                                                                                                                                                                                                                                                                                                                                                                                                                                                                                                                                                                      | Search modes - Boolean/Phrase |
| S120 | TI fluoridation* OR AB fluoridation*                                                                                                                                                                                                                                                                                                                                                                                                                                                                                                                                                                                                                                                                                                | Search modes - Boolean/Phrase |
| S119 | TI ( (subgingival or gingival) N0 (curettage* or retraction*) ) OR AB ( (subgingival or gingival) N0 (curettage* or retraction*) )                                                                                                                                                                                                                                                                                                                                                                                                                                                                                                                                                                                                  | Search modes - Boolean/Phrase |
| S118 | TI root N1 planing* OR AB root N1 planing*                                                                                                                                                                                                                                                                                                                                                                                                                                                                                                                                                                                                                                                                                          | Search modes - Boolean/Phrase |
| S117 | TI ( (dental or mouth or t??th) N0 debridement* ) OR AB ( (dental or mouth or t??th) N0 debridement* )                                                                                                                                                                                                                                                                                                                                                                                                                                                                                                                                                                                                                              | Search modes - Boolean/Phrase |
| S116 | TI ( periodontal N1 ("tissue regeneration*" or debridement*) ) OR AB ( periodontal N1 ("tissue regeneration*" or debridement*) )                                                                                                                                                                                                                                                                                                                                                                                                                                                                                                                                                                                                    | Search modes - Boolean/Phrase |
| S115 | TI ( periodontal N0 (medicine*or prosthes?s or splint* or dressing* or prevention*) ) OR AB ( periodontal N0 (medicine*or prosthes?s or splint* or dressing* or prevention*) )                                                                                                                                                                                                                                                                                                                                                                                                                                                                                                                                                      | Search modes - Boolean/Phrase |

|      |                                                                                                                                              |                               |
|------|----------------------------------------------------------------------------------------------------------------------------------------------|-------------------------------|
| S114 | TI ( (oral or maxillofacial) N2 patholog* ) OR AB ( (oral or maxillofacial) N2 patholog* )                                                   | Search modes - Boolean/Phrase |
| S113 | TI ( tooth N1 (movement* or intrusion* or depression* or care) ) OR AB ( tooth N1 (movement* or intrusion* or depression* or care) )         | Search modes - Boolean/Phrase |
| S112 | TI ( palate N0 (plast* or reconstruction* or operation*) ) OR AB ( palate N0 (plast* or reconstruction* or operation*) )                     | Search modes - Boolean/Phrase |
| S111 | TI palatoplast* OR AB palatoplast*                                                                                                           | Search modes - Boolean/Phrase |
| S110 | TI ( (maxillary or palatal) N0 expansion* ) OR AB ( (maxillary or palatal) N0 expansion* )                                                   | Search modes - Boolean/Phrase |
| S109 | TI forced N1 eruption* OR AB forced N1 eruption*                                                                                             | Search modes - Boolean/Phrase |
| S108 | TI crown N0 lengthening OR AB crown N0 lengthening                                                                                           | Search modes - Boolean/Phrase |
| S107 | TI invisalign* OR AB invisalign*                                                                                                             | Search modes - Boolean/Phrase |
| S106 | TI bionator* OR AB bionator*                                                                                                                 | Search modes - Boolean/Phrase |
| S105 | TI jasper N0 jumper* OR AB jasper N0 jumper*                                                                                                 | Search modes - Boolean/Phrase |
| S104 | TI ( (function or harvold) N0 activator* ) OR AB ( (function or harvold) N0 activator* )                                                     | Search modes - Boolean/Phrase |
| S103 | TI frankel N1 regulator* OR AB frankel N1 regulator*                                                                                         | Search modes - Boolean/Phrase |
| S102 | TI ( (clear aligner or herbst or bimler or andresen) N0 appliance* ) OR AB ( (clear aligner or herbst or bimler or andresen) N0 appliance* ) | Search modes - Boolean/Phrase |
| S101 | TI ( (fixed or bonded or permanent) N0 retainer* ) OR AB ( (fixed or bonded or permanent) N0 retainer* )                                     | Search modes - Boolean/Phrase |
| S100 | TI ( (fixed or activator or extraoral) N1 appliance* ) OR AB ( (fixed or activator or extraoral) N1 appliance* )                             | Search modes - Boolean/Phrase |

|     |                                                                                                                                                                                                                                        |                               |
|-----|----------------------------------------------------------------------------------------------------------------------------------------------------------------------------------------------------------------------------------------|-------------------------------|
| S99 | TI ( occlusal N0 (splint* or adjustment* or equilibration* ) ) OR AB ( occlusal N0 (splint* or adjustment* or equilibration* ) )                                                                                                       | Search modes - Boolean/Phrase |
| S98 | TI mandibular N0 advancement OR AB mandibular N0 advancement                                                                                                                                                                           | Search modes - Boolean/Phrase |
| S97 | TI ( dental N0 (internal or marginal) N0 adaptation* ) OR AB ( dental N0 (internal or marginal) N0 adaptation* )                                                                                                                       | Search modes - Boolean/Phrase |
| S96 | TI ( uvulopharyngopalatoplast* or uvulopalatoplast* or palatouvuolopharyngoplast* or pharyngouvuolopalatoplast* ) OR AB ( uvulopharyngopalatoplast* or uvulopalatoplast* or palatouvuolopharyngoplast* or pharyngouvuolopalatoplast* ) | Search modes - Boolean/Phrase |
| S95 | TI odontectom* OR AB odontectom*                                                                                                                                                                                                       | Search modes - Boolean/Phrase |
| S94 | TI ( Molar N0 (amputation* or extraction*) ) OR AB ( Molar N0 (amputation* or extraction*) )                                                                                                                                           | Search modes - Boolean/Phrase |
| S93 | TI Exodont* OR AB Exodont*                                                                                                                                                                                                             | Search modes - Boolean/Phrase |
| S92 | TI ( (t??th or serial) N0 extraction* ) OR AB ( (t??th or serial) N0 extraction* )                                                                                                                                                     | Search modes - Boolean/Phrase |
| S91 | TI sinus N1 augmentation* OR AB sinus N1 augmentation*                                                                                                                                                                                 | Search modes - Boolean/Phrase |
| S90 | TI “sagittal split” N1 osteotom* OR AB “sagittal split” N1 osteotom*                                                                                                                                                                   | Search modes - Boolean/Phrase |
| S89 | TI “Le fort” N0 operation* OR AB “Le fort” N0 operation*                                                                                                                                                                               | Search modes - Boolean/Phrase |
| S88 | TI ( (“le fort” or lefort or maxilla* or jaw or mandib*) N1 osteotom* ) OR AB ( (“le fort” or lefort or maxilla* or jaw or mandib*) N1 osteotom* )                                                                                     | Search modes - Boolean/Phrase |
| S87 | TI alveolar N1 graft* OR AB alveolar N1 graft*                                                                                                                                                                                         | Search modes - Boolean/Phrase |
| S86 | TI ( (endosseous or subperiosteal) N1 implant* ) OR AB ( (endosseous or subperiosteal) N1 implant* )                                                                                                                                   | Search modes - Boolean/Phrase |
| S85 | TI ( alveolectom* or alveoloplast* or vestibuloplast* ) OR AB ( alveolectom* or alveoloplast* or vestibuloplast* )                                                                                                                     | Search modes - Boolean/Phrase |

|     |                                                                                                                                                                                                                                                                                          |                               |
|-----|------------------------------------------------------------------------------------------------------------------------------------------------------------------------------------------------------------------------------------------------------------------------------------------|-------------------------------|
| S84 | TI ( (maxillary or mandibular or alveolar) NO ridge augmentation* ) OR AB ( (maxillary or mandibular or alveolar) NO ridge augmentation* )                                                                                                                                               | Search modes - Boolean/Phrase |
| S83 | TI ( chinplast* or mentoplast* ) OR AB ( chinplast* or mentoplast* )                                                                                                                                                                                                                     | Search modes - Boolean/Phrase |
| S82 | TI ( chin N1 (correction* or reconstruction * or reduction* or surger* or operation*) ) OR AB ( chin N1 (correction* or reconstruction * or reduction* or surger* or operation*) )                                                                                                       | Search modes - Boolean/Phrase |
| S81 | TI genioplast* OR AB genioplast*                                                                                                                                                                                                                                                         | Search modes - Boolean/Phrase |
| S80 | TI maxillectom* OR AB maxillectom*                                                                                                                                                                                                                                                       | Search modes - Boolean/Phrase |
| S79 | TI ( (upper jaw or maxilla*) NO resection) ) OR AB ( (upper jaw or maxilla*) NO resection) )                                                                                                                                                                                             | Search modes - Boolean/Phrase |
| S78 | TI ( (maxillofacial or mandibular) NO (prothes?s or impant*) ) OR AB ( (maxillofacial or mandibular) NO (prothes?s or impant*) )                                                                                                                                                         | Search modes - Boolean/Phrase |
| S77 | TI ( “mandible ostectom*” or mandibulectom* ) OR AB ( “mandible ostectom*” or mandibulectom* )                                                                                                                                                                                           | Search modes - Boolean/Phrase |
| S76 | TI ( mandibula* NO (advancement* or reconstruction* or restoration* or resection*) ) OR AB ( mandibula* NO (advancement* or reconstruction* or restoration* or resection*) )                                                                                                             | Search modes - Boolean/Phrase |
| S75 | TI ( (jaw or maxillomandibular) NO fixation* ) OR AB ( (jaw or maxillomandibular) NO fixation* )                                                                                                                                                                                         | Search modes - Boolean/Phrase |
| S74 | TI ( (tongue or lingual) NO (extirpation* or resection*) ) OR AB ( (tongue or lingual) NO (extirpation* or resection*) )                                                                                                                                                                 | Search modes - Boolean/Phrase |
| S73 | TI ( apicoectom* or gingivectom* or gingivoplast* or glossectom* ) OR AB ( apicoectom* or gingivectom* or gingivoplast* or glossectom* )                                                                                                                                                 | Search modes - Boolean/Phrase |
| S72 | TI dental NO infection NO control* OR AB dental NO infection NO control*                                                                                                                                                                                                                 | Search modes - Boolean/Phrase |
| S71 | TI ( Dental NO (reimplantation* or replantation* or reinclusion*) ) OR AB ( Dental NO (reimplantation* or replantation* or reinclusion*) )                                                                                                                                               | Search modes - Boolean/Phrase |
| S70 | TI ( t??th NO (bleaching or whitening or replantation* or reimplantation* or extrusion* or uprighting* or remineralization* or polishing or restoration* or surger* or inlay* or preparation* or removal* or resection*)) ) OR AB ( t??th NO (bleaching or whitening or replantation* or | Search modes - Boolean/Phrase |

|     |                                                                                                                                                                                                                                                                                                                      |                               |
|-----|----------------------------------------------------------------------------------------------------------------------------------------------------------------------------------------------------------------------------------------------------------------------------------------------------------------------|-------------------------------|
|     | reimplantation* or extrusion* or uprighting* or remineralization* or polishing or restoration* or surger* or inlay* or preparation* or removal* or resection*)) )                                                                                                                                                    |                               |
| S69 | TI ( (dental or enamel) N0 microabrasion* ) OR AB ( (dental or enamel) N0 microabrasion* )                                                                                                                                                                                                                           | Search modes - Boolean/Phrase |
| S68 | TI ( dental N1 (implant* or prosthes?s) ) OR AB ( dental N1 (implant* or prosthes?s) )                                                                                                                                                                                                                               | Search modes - Boolean/Phrase |
| S67 | TI ( Sinus N0 lifting* ) OR AB ( Sinus N0 or lifting* )                                                                                                                                                                                                                                                              | Search modes - Boolean/Phrase |
| S66 | TI "Jaw relation record*" OR AB "Jaw relation record*"                                                                                                                                                                                                                                                               | Search modes - Boolean/Phrase |
| S65 | TI ( (tooth or dental) N0 (an#esthesia or an#esthetic* or casting* ) ) OR AB ( (tooth or dental) N0 (an#esthesia or an#esthetic* or casting* ) )                                                                                                                                                                     | Search modes - Boolean/Phrase |
| S64 | TI ( (dental or tooth or caries) N1 prevention ) OR AB ( (dental or tooth or caries) N1 prevention )                                                                                                                                                                                                                 | Search modes - Boolean/Phrase |
| S63 | TI ( (dental or tooth) N2 filling* ) OR AB ( (dental or tooth) N2 filling* )                                                                                                                                                                                                                                         | Search modes - Boolean/Phrase |
| S62 | TI ( dental N0 (esthetic* or aesthetic* or floss or scaling* or brace* or hygiene* or polishing or radiology or bonding or soldering* or prosthetic* ) ) OR AB ( dental N0 (esthetic* or aesthetic* or floss or scaling* or brace* or hygiene* or polishing or radiology or bonding or soldering* or prosthetic* ) ) | Search modes - Boolean/Phrase |
| S61 | TI ( (evidence-based or preventative or cosmetic or operative or prosthetic or reparative) N1 dentistry ) OR AB ( (evidence-based or preventative or cosmetic or operative or prosthetic or reparative) N1 dentistry )                                                                                               | Search modes - Boolean/Phrase |
| S60 | TI oral N0 hygiene OR AB oral N0 hygiene                                                                                                                                                                                                                                                                             | Search modes - Boolean/Phrase |
| S59 | TI ( (maxillo-mandibular or maxillomandibular or oral or maxillofacial or orthognathic) N1 procedure* ) OR AB ( (maxillo-mandibular or maxillomandibular or oral or maxillofacial or orthognathic) N1 procedure* )                                                                                                   | Search modes - Boolean/Phrase |
| S58 | TI ( (maxillo-mandibular or maxillomandibular or oral or maxillofacial or orthognathic or jaw) N1 surg* ) OR AB ( (maxillo-mandibular or maxillomandibular or oral or maxillofacial or orthognathic or jaw) N1 surg* )                                                                                               | Search modes - Boolean/Phrase |

|     |                                                                                                                                                        |                               |
|-----|--------------------------------------------------------------------------------------------------------------------------------------------------------|-------------------------------|
| S57 | TI ( (supragingival or subgingival or dental or root) N0 scaling* ) OR AB ( (supragingival or subgingival or dental or root) N0 scaling* )             | Search modes - Boolean/Phrase |
| S56 | TI ( (dental or periodontal or t??th) N0 prophylaxis ) OR AB ( (dental or periodontal or t??th) N0 prophylaxis )                                       | Search modes - Boolean/Phrase |
| S55 | TI community N0 dentistry OR AB community N0 dentistry                                                                                                 | Search modes - Boolean/Phrase |
| S54 | TI fluorescence N0 “quantitative light-induced” OR AB fluorescence N0 “quantitative light-induced”                                                     | Search modes - Boolean/Phrase |
| S53 | TI ( Dental N0 (“x ray” or xray) ) OR AB ( Dental N0 (“x ray” or xray) )                                                                               | Search modes - Boolean/Phrase |
| S52 | TI ( (dental or bitewing or tooth) N0 (radiography or radiovisiography) ) OR AB ( (dental or bitewing or tooth) N0 (radiography or radiovisiography) ) | Search modes - Boolean/Phrase |
| S51 | TI ( (dental or intraoral or orthodontic) N0 photograph* ) OR AB ( (dental or intraoral or orthodontic) N0 photograph* )                               | Search modes - Boolean/Phrase |
| S50 | TI dental N0 pulp test* OR AB dental N0 pulp test*                                                                                                     | Search modes - Boolean/Phrase |
| S49 | TI ( (diagnos* or examination*) N0 (oral or dental) ) OR AB ( (diagnos* or examination*) N0 (oral or dental) )                                         | Search modes - Boolean/Phrase |
| S48 | TI ( (mouth or oral) N1 rehabilitation* ) OR AB ( (mouth or oral) N1 rehabilitation* )                                                                 | Search modes - Boolean/Phrase |
| S47 | TI ( “community periodontal index of treatment needs” or cpitn ) OR AB ( “community periodontal index of treatment needs” or cpitn )                   | Search modes - Boolean/Phrase |
| S46 | TI varnish* N1 cavity OR AB varnish* N1 cavity                                                                                                         | Search modes - Boolean/Phrase |
| S45 | TI “cavity lining*” N0 dental OR AB “cavity lining*” N0 dental                                                                                         | Search modes - Boolean/Phrase |
| S44 | TI ( (“pre prosthetic” or preprosthetic) N0 surger* ) OR AB ( (“pre prosthetic” or preprosthetic) N0 surger* )                                         | Search modes - Boolean/Phrase |
| S43 | TI parotidectom* OR AB parotidectom*                                                                                                                   | Search modes - Boolean/Phrase |

|     |                                                                                                                                                                                                                                                                                                                                                                |                               |
|-----|----------------------------------------------------------------------------------------------------------------------------------------------------------------------------------------------------------------------------------------------------------------------------------------------------------------------------------------------------------------|-------------------------------|
| S42 | TI ( (oral or mouth) N1 surg* ) OR AB ( (oral or mouth) N1 surg* )                                                                                                                                                                                                                                                                                             | Search modes - Boolean/Phrase |
| S41 | TI ( root canal N0 (therap* or procedure* or obturation* or preparation* or surger*) ) OR AB ( root canal N0 (therap* or procedure* or obturation* or preparation* or surger*) )                                                                                                                                                                               | Search modes - Boolean/Phrase |
| S40 | TI ( Orthodontic N1 (“space closure” or anchorage* or extrusion*) ) OR AB ( Orthodontic N1 (“space closure” or anchorage* or extrusion*) )                                                                                                                                                                                                                     | Search modes - Boolean/Phrase |
| S39 | TI ( orthodontia or orthodontolog* or orthodonty ) OR AB ( orthodontia or orthodontolog* or orthodonty )                                                                                                                                                                                                                                                       | Search modes - Boolean/Phrase |
| S38 | TI ( endodontics or orthodontics or periodontics or prosthodontics ) OR AB ( endodontics or orthodontics or periodontics or prosthodontics )                                                                                                                                                                                                                   | Search modes - Boolean/Phrase |
| S37 | TI ( (dental or t??th or periodontal) N0 cleaning ) OR AB ( (dental or t??th or periodontal) N0 cleaning )                                                                                                                                                                                                                                                     | Search modes - Boolean/Phrase |
| S36 | TI ( (periodont* or orthodontic* or prosthodont* or endodontic) N1 (treatment* or procedure* or surger* or care) ) OR AB ( (periodont* or orthodontic* or prosthodont* or endodontic) N1 (treatment* or procedure* or surger* or care) )                                                                                                                       | Search modes - Boolean/Phrase |
| S35 | TI “bleeding on probing” N2 gingival OR AB “bleeding on probing” N2 gingival                                                                                                                                                                                                                                                                                   | Search modes - Boolean/Phrase |
| S34 | TI ( (decayed or missing or filled) N2 teeth ) OR AB ( (decayed or missing or filled) N2 teeth )                                                                                                                                                                                                                                                               | Search modes - Boolean/Phrase |
| S33 | TI “dental health” N1 survey* OR AB “dental health” N1 survey*                                                                                                                                                                                                                                                                                                 | Search modes - Boolean/Phrase |
| S32 | TI oral N1 care OR AB oral N1 care                                                                                                                                                                                                                                                                                                                             | Search modes - Boolean/Phrase |
| S31 | TI denture* OR AB denture*                                                                                                                                                                                                                                                                                                                                     | Search modes - Boolean/Phrase |
| S30 | TI dental stress analys?s OR AB dental stress analys?s                                                                                                                                                                                                                                                                                                         | Search modes - Boolean/Phrase |
| S29 | TI ( dent* N1 (“check-up” or health or intervention* or clinic* or treatment* or therap* or program* or practice* or education or procedure* or restorat* or regenerative*) ) OR AB ( dent* N1 (“check-up” or health or intervention* or clinic* or treatment* or therap* or program* or practice* or education or procedure* or restorat* or regenerative*) ) | Search modes - Boolean/Phrase |



|     |                                                                                                     |                                                                                    |
|-----|-----------------------------------------------------------------------------------------------------|------------------------------------------------------------------------------------|
| S28 | TI dental N2 service* OR AB dental N2 service*                                                      | Search modes -<br>Boolean/Phrase                                                   |
| S27 | TI care N2 dental OR AB care N2 dental                                                              | Search modes -<br>Boolean/Phrase                                                   |
| S26 | S17 OR S25                                                                                          | Search modes -<br>Boolean/Phrase                                                   |
| S25 | S23 OR S24                                                                                          | Search modes -<br>Boolean/Phrase                                                   |
| S24 | S22                                                                                                 | Limiters - Special<br>Interest: Dental<br>Care<br>Search modes -<br>Boolean/Phrase |
| S23 | S21 AND S22                                                                                         | Search modes -<br>Boolean/Phrase                                                   |
| S22 | S18 OR S19 OR S20                                                                                   | Search modes -<br>Boolean/Phrase                                                   |
| S21 | (MH "Dentistry+")                                                                                   | Search modes -<br>Boolean/Phrase                                                   |
| S20 | (MH "Patient Education+")                                                                           | Search modes -<br>Boolean/Phrase                                                   |
| S19 | (MH "Public Health")                                                                                | Search modes -<br>Boolean/Phrase                                                   |
| S18 | (MH "Health Promotion+")                                                                            | Search modes -<br>Boolean/Phrase                                                   |
| S17 | S1 OR S2 OR S3 OR S4 OR S5 OR S6 OR S7 OR S8 OR S9 OR S10 OR S11 OR S12 OR S13 OR S14 OR S15 OR S16 | Search modes -<br>Boolean/Phrase                                                   |
| S16 | (MH "Oral Medicine")                                                                                | Search modes -<br>Boolean/Phrase                                                   |
| S15 | (MH "Prosthodontics+")                                                                              | Search modes -<br>Boolean/Phrase                                                   |

|     |                                                                  |                                  |
|-----|------------------------------------------------------------------|----------------------------------|
| S14 | (MH "Preventive Dentistry+")                                     | Search modes -<br>Boolean/Phrase |
| S13 | (MH "Periodontics+")                                             | Search modes -<br>Boolean/Phrase |
| S12 | (MH "Pathology, Oral")                                           | Search modes -<br>Boolean/Phrase |
| S11 | (MH "Orthodontics+")                                             | Search modes -<br>Boolean/Phrase |
| S10 | (MH "Surgery, Oral+")                                            | Search modes -<br>Boolean/Phrase |
| S9  | (MH "Esthetics, Dental")                                         | Search modes -<br>Boolean/Phrase |
| S8  | (MH "Endodontics+")                                              | Search modes -<br>Boolean/Phrase |
| S7  | (MH "Dentistry, Operative+")                                     | Search modes -<br>Boolean/Phrase |
| S6  | (MH "Dental Health Services+")                                   | Search modes -<br>Boolean/Phrase |
| S5  | (MH "Dental Prophylaxis+")                                       | Search modes -<br>Boolean/Phrase |
| S4  | (MH "Diagnosis, Oral+")                                          | Search modes -<br>Boolean/Phrase |
| S3  | (MH "Public Health Dentistry") OR (MH "Dental Health Education") | Search modes -<br>Boolean/Phrase |
| S2  | (MH "Dental Clinics")                                            | Search modes -<br>Boolean/Phrase |
| S1  | (MH "Dental Care+")                                              | Search modes -<br>Boolean/Phrase |

**Key**

MH = indexing term (CINAHL heading)

\* = truncation

TI = terms in the title

AB = terms in the abstract

“ ” = phrase search.

Nn = terms within n words of each other (any order)

# = Optional wildcards (stands for 1 or 0 characters)

? = Mandatory wildcards (stands for exactly 1 character)

#### **4. Sociological Abstracts**

**Language: English**

**Publication year: after 1999**

**Searched on Aug.27, 2019**

**Records retrieved: 372**

##### **Search Strategy:**

Since this is a very specific database, we only searched the terms for the "Intervention" and did not search the terms for the "outcome."

su(dental care) OR ((noft((care NEAR/2 dental) OR (dental NEAR/2 service\*) OR (dental NEAR/1 "check up") OR (dental NEAR/1 (health OR intervention\* OR clinic\* OR treatment\* OR therap\* OR program\* OR practice\* OR education OR procedure\* OR restorat\* OR regenerative\*)) OR (dental stress analys?s) OR denture\* OR (oral NEAR/1 care) OR ("dental health" NEAR/1 survey\*) OR ((decayed OR missing OR filled) NEAR/2 teeth) OR endodontics OR orthodontics OR periodontics OR prosthodontics OR ((periodont\* OR orthodontic\* OR prosthodont\* OR endodontic) NEAR/1 (treatment\* OR procedure\* OR surger\* OR care)) OR ((dental OR t??th OR periodontal) NEAR/0 cleaning)) OR noft((((orthodontia OR orthodontolog\* OR

orthodontology) OR ((oral OR mouth) NEAR/1 surg\*) OR ("community periodontal index of treatment needs" OR cpitn) OR ((mouth OR oral) NEAR/1 rehabilitation\*) OR (((diagnos\* OR examination\*) NEAR/0 (oral OR dental))) OR (community NEAR/0 dentistry) OR (((dental OR periodontal OR t??th) NEAR/0 prophylaxis)) OR (((maxillo-mandibular OR maxillomandibular OR oral OR maxillofacial OR orthognathic OR jaw) NEAR/0 surg\*) OR ((maxillo-mandibular OR maxillomandibular OR oral OR maxillofacial OR orthognathic) NEAR/1 procedure\*)) OR ((oral NEAR/0 hygiene)))) OR noft((((("evidence-based" OR preventative OR cosmetic OR operative OR prosthetic OR reparative) NEAR/1 dentistry) OR (dental NEAR/0 (esthetic\* OR aesthetic\* OR floss OR scaling\* OR brace\* OR hygiene\* OR polishing OR radiology OR bonding OR soldering\* OR prosthetic\*)) OR ((dental OR tooth) NEAR/2 filling\*) OR ((dental OR tooth OR caries) NEAR/1 prevention) OR (dental NEAR/1 (implant\* OR prosthes?s)) OR ((tooth OR teeth) NEAR/0 (whitening OR remineralization\* OR polishing OR restoration\* OR surger\* OR preparation\* OR removal\*)) OR (dental NEAR/0 infection NEAR/0 control\*) OR (tooth NEAR/1 (movement\* OR care)))) OR noft(fluoridation\* OR (oral NEAR/0 medicine) OR (mouth NEAR/0 guard) OR (root NEAR/0 planing) OR ((oral OR maxillofacial) NEAR/2 pathology) OR (periodontal NEAR/0 medicine) OR (periodontal NEAR/0 (prosthesis OR prostheses)) OR (periodontal NEAR/0 prevention) OR (mouth NEAR/0 protection)))

## Key

Su = subject heading

Noft = anywhere except full text

NEAR/x = terms within x words of each other (any order)

\*= truncation

“ ” = phrase search

? = Mandatory wildcards (stands for exactly 1 character)
